# 1           **Characterization of the DNA binding domain of StbA, a key** 2           **protein of a new type of DNA segregation system**

3  
4   Valentin Quèbre<sup>1</sup>, Irene del Campo<sup>2</sup>, Ana Cuevas<sup>2</sup>, Patricia Siguier<sup>1</sup>, Jérôme Rech<sup>1</sup>, Phan Thai Nguyen Le<sup>1</sup>,  
5   Bao Ton-Hoang<sup>1</sup>, François Cornet<sup>1</sup>, Jean-Yves Bouet<sup>1</sup>, Gabriel Moncalian<sup>2\*</sup>, Fernando de la Cruz<sup>2\*</sup> and  
6   Catherine Guynet<sup>1\*</sup>

7  
8   <sup>1</sup>Laboratoire de Microbiologie et de Génétique Moléculaires, Centre de Biologie Intégrative (CBI), Centre  
9   National de la Recherche Scientifique, Université de Toulouse, UPS, F-31000, Toulouse, France.

10   <sup>2</sup> Departamento de Biología Molecular, Universidad de Cantabria and Instituto de Biomedicina y Bio-  
11   tecnología de Cantabria (IBBTEC), Universidad de Cantabria-CSIC, Santander, Spain.

12  
13   \* To whom correspondence should be addressed.

14   Email : [Catherine.Guynet@univ-tlse3.fr](mailto:Catherine.Guynet@univ-tlse3.fr); [gabriel.moncalian@unican.es](mailto:gabriel.moncalian@unican.es);  
15   [delacruz@unican.es](mailto:delacruz@unican.es)

16  
17   **KEY WORDS: plasmid, DNA segregation, Bacterial conjugation, Transcription factor, Helix-turn-helix**

## 1 **Abstract**

2 Low-copy-number plasmids require sophisticated genetic devices to achieve efficient  
3 segregation of plasmid copies during cell division. Plasmid R388 uses a unique  
4 segregation mechanism, based on StbA, a small multifunctional protein. StbA is the key  
5 protein in a segregation system not involving a plasmid-encoded NTPase partner, it  
6 regulates the expression of several plasmid operons, and it is the main regulator of  
7 plasmid conjugation. The mechanisms by which StbA, together with the centromere-like  
8 sequence *stbS*, achieves segregation, is largely uncharacterized. To better understand  
9 the molecular basis of R388 segregation, we determined the crystal structure of the  
10 conserved N-terminal domain of StbA to 1.9 Å resolution. It folds into an HTH DNA-  
11 binding motif, structurally related to that of the PadR subfamily II of transcriptional  
12 regulators. StbA is organized in two domains. Its N-terminal domain carries the specific  
13 *stbS* DNA binding activity. A truncated version of StbA, deleted of its C-terminal domain,  
14 displays only partial activities *in vivo*, indicating that the non-conserved C-terminal  
15 domain is required for efficient segregation and subcellular plasmid positioning. The  
16 structure of StbA DNA-binding domain also provides some insight into how StbA  
17 monomers cooperate to repress transcription by binding to the *stbDR* and to form the  
18 segregation complex with *stbS*.

19

20

## 1 Introduction

2

3 The inheritance of genetic information is a fundamental biological process, essential in  
4 all living cells. In bacteria, most chromosomes and low copy-number plasmids are  
5 endowed with active segregation (or partition) systems that grant their transmission  
6 from parents to offspring. For plasmids, they are composed of three essential  
7 components that are necessary and sufficient for their maintenance over generations:  
8 a *cis*-acting centromere-like site and two genes, arranged in an operon encoding an  
9 NTPase and a centromere-binding protein (CBP) (reviews (1); (2)). The partition process  
10 involves: (i) the assembly of a nucleoprotein complex, called the partition complex, by  
11 binding of the CBP to the centromere-like site, and (ii) positioning of the partition  
12 complexes by the action of the NTPase. This latter involves the separation of the two  
13 copies after their duplication, their transport toward opposite cell poles, and their  
14 positioning around their new segregated positions until cell division occurs.

15 Three main groups of partition systems have been described, exemplified by  
16 those encoded by plasmids F and P1 (Type I or ParABS), R1 (Type II or ParMRC) and pXO1  
17 (Type III or TubRZC), which are defined by the protein family to which their NTPase  
18 protein belongs (2): namely, Walker A/p-loop ATPases, actin-like and tubulin-like,  
19 respectively. Type I partition systems are by far the most abundant on low copy-  
20 number plasmids and are also the only type encoded by chromosomes. Contrary to the  
21 NTPases, the CBP proteins do not show significant sequence similarities, even within  
22 the same partition group, although they share structural motifs involved in DNA-  
23 binding, in particular their DNA binding motifs. CBPs are dimers composed either of  
24 Helix-Turn-Helix motifs (HTH<sub>2</sub>, Type Ia and Type III) or Ribbon-Helix-Helix motifs (RHH<sub>2</sub>,

1 Type Ib and Type II) structural domains (2). Generally, RHH<sub>2</sub> CBPs cognate centromeres  
2 carry arrays of direct repeat sequences that vary extensively in length and  
3 organization. In contrast, HTH<sub>2</sub> CBPs are associated with centromeres containing one  
4 or more 13- to 16- bp inverted repeat DNA sequences.

5 That being said, some low-copy-number plasmids do not encode canonical  
6 segregation systems. Among them, two plasmids, the staphylococcal plasmid pSK1 and  
7 the enterobacterial plasmid R388, the prototype of the PTU—W family of broad host  
8 range conjugative plasmids (3), encode non-canonical systems that involve just a single  
9 plasmid-encoded protein devoid of NTPase activity ((4);(5); (1)). These plasmids thus  
10 harbor novel segregation systems for which no plasmid-encoded NTPase is present. The  
11 partitioning mechanisms of these two unrelated plasmids are not understood.

12 Plasmid R388 segregation relies on (i) the StbA protein, encoded by the *stbABC*  
13 operon, and (ii) on *stbS*, the *cis*-acting centromere-like site located in the promoter of  
14 the operon (5). Notably, the *stbABC* operon is close to the origin of transfer (*oriT*)  
15 region and is divergently transcribed to the *trwABC* operon involved in conjugative  
16 DNA processing (Figure 1). The *stb* operon contains three genes, *stbA*, *stbB* and *stbC*.  
17 StbA is the only plasmid-encoded protein required for R388 segregation (5). It was  
18 proposed to ensure positioning of plasmid copies in the nucleoid area, since its  
19 inactivation leads to aberrant intracellular positioning of plasmid DNA molecules at the  
20 cell poles, correlated to plasmid instability without affecting plasmid copy number  
21 (Figure 1, (5); (6)). Contrary to what one might expect (by analogy with Par systems)  
22 StbB, which contains a putative ATPase motif, is not involved in R388 stability (5). Also,  
23 *stbC* encodes a protein with no significant homologs, and its deletion shows no effect  
24 in stability and conjugation of plasmid R388 in *E. coli* (5).

1           In addition to its role in plasmid segregation, StbA acts as a transcriptional  
2 repressor of the expression of some R388 genes present in the leading region (*stbA*,  
3 *ardC*, *orf7*, *orf12* and *orf14*) (7). All StbA-regulated promoters include two or more  
4 direct repeats of a 9-bp DNA sequence with the consensus sequence 5'C/TTGCATCAT,  
5 called *stbDR*, separated by 2-bp spacers ((8); Figure 1). The upstream region of the *stb*  
6 operon includes the centromere-like site *stbS*, consisting in two sets of five *stbDR*. *stbS*  
7 is strictly required for plasmid R388 stabilization by StbA, but not for conjugation.  
8 Besides, StbA, together with StbB, controls the conjugation process but with opposite  
9 and interdependent effects. Indeed, while deletion of the entire *stb* operon did not  
10 significantly affect conjugation, an activation (50-fold) or a total inhibition of the  
11 frequency of conjugation was observed when *stbA* or *stbB* were deleted, respectively.  
12 This dual role of StbA hinted for the first time a mechanistic interplay between  
13 segregation and conjugation (5) (1). Experimental evidence for functional links  
14 between plasmid segregation and conjugation functions have also been described for  
15 plasmids R1 and RA3, although by distinct mechanisms (9, 10).

16           To gain insight into the molecular mechanism by which StbA controls plasmid  
17 R388 segregation, we carried out structural, biochemical and *in silico* analyses that  
18 characterized the role of the N-terminal domain of the protein. We found that it folds  
19 into an HTH motif resembling the DNA-binding domain of the PadR family of  
20 transcription factors. We show that the StbA N-terminal domain includes the DNA  
21 binding activity required for specific binding to the *stbDR*, as well as for transcriptional  
22 repression and for StbA activities in plasmid segregation and in the control of  
23 conjugation.

24

## 1 **Materials and methods**

### 2 **Bacterial strains, plasmids and general procedures**

3 Bacterial strains and plasmids used in this study are listed in Table S1, and  
4 oligonucleotides in Table S2. Plasmid pET-StbA<sub>1-75</sub> was constructed by amplifying the  
5 truncated *stbA* gene encoding the first 75 residues of StbA by PCR from plasmid R388  
6 using primers StbAN and StbA75 and introduced between the *NdeI* and *XhoI* restriction  
7 sites of pET29c (Novagen). Plasmid R388-StbA<sub>1-75</sub> was constructed in two steps by  
8 replacement of the *stb* operon in R388 (Table S1) by a mutated version carrying a  
9 truncated *stbA* gene encoding the 75 first residues of StbA (*stbA*<sub>1-75</sub>). First, a sequence  
10 containing the *stb* promoter and *stbA*<sub>1-75</sub> and a sequence containing *stbB* and *stbC* were  
11 amplified by PCR from plasmid R388 using primers CG440 and CG387b, and CG441 and  
12 CG392, respectively (Table S2). These PCR products were then assembled and cloned  
13 into a plasmid pAPT110 linearized with *NheI* using the In-Fusion® HD cloning kit (Takara  
14 Bio) to generate plasmid p4G39. Secondly, R388-StbA<sub>1-75</sub> was constructed using phage  $\lambda$   
15 red-mediated gene recombination using DY380 strain (11). DNA substrates were  
16 generated through PCR amplification from p4G39 with primers CG426 and CG427 that  
17 produced a linear DNA fragment containing the mutated *stb* operon and a Kanamycin  
18 resistance cassette containing and at least 50 bp terminal arms homologous to the  
19 sequences upstream and downstream of the *stb* operon. DNA substrates were  
20 introduced by electroporation into DY380 strain harboring R388 grown as described in  
21 (12). Cells were plated on agar plates containing Km to select for the desired insertion.  
22 Plasmid R388-StbA<sub>1-75</sub> $\Delta$ *stbB* was constructed following the same strategy but using  
23 primers CG442 and CG443 to generate plasmid p4G41. Constructions were all verified

1 by sequencing of a PCR product of the corresponding region using appropriate primers  
2 (see Table S2).

3 Luria–Bertani (LB) broth was used for bacterial growth (13). For microscopy, M9 medium  
4 supplemented with 0.2% casamino acids, 0.4% glucose, 2 µg/ml thiamine, 20 µg/ml  
5 leucine and 20 µg/ml thymine was used. Selective media included antibiotics as needed  
6 at the following concentrations: ampicillin (Ap), 100 µg/ml; chloramphenicol (Cm), 10  
7 µg/ml; Kanamycin (Km), 25 µg/ml; nalidixic acid (Nx), 20 µg/ml; streptomycin (Sm), 300  
8 µg/ml; spectinomycin (Sp), 30 µg/ml. Plasmid DNA was extracted using PureYield™  
9 plasmid miniprep system (Promega). PCR products were purified using GFX™ PCR DNA  
10 and Gel Band Purification Kit (GE Healthcare). Restriction endonucleases and T4 DNA  
11 ligase were purchased from Thermo Fisher Scientific and PrimeSTAR DNA polymerase  
12 from Takara Bio. Primer oligonucleotides were purchased from Eurofins Genomics.

13

#### 14 ***In silico* analyses**

15

16 BLASTP searches were performed on the NCBI BLAST online interface ([http://www.ncbi-  
17 nlm-nih-gov.insb.bib.cnrs.fr/BLAST/](http://www.ncbi.nlm-nih-gov.insb.bib.cnrs.fr/BLAST/)) with default parameters. The search for protein  
18 domains was carried out using the Interpro (14) and Pfam (15) databases. Multiple  
19 alignment was performed using ClustalW (16), the ClustalW algorithm (17) was used for  
20 multiple alignments and results were displayed using the Jalview alignment editor (18).  
21 The public Galaxy platform at Pasteur was used as an execution engine for web services  
22 (19).

23

#### 24 **Conjugation and stability assays**

1 Conjugation and stability assays were performed as described in (5). The percentage of  
2 plasmids loss (L) per generation were calculated as previously described (20): % L = 1-  
3  $(F_f/F_i)^{(1/n)} \times 100$ , where  $F_f$  is the fraction of cells carrying the plasmid initially and  $F_i$  is the  
4 plasmid-carrying fraction after n generations of non-selective growth.

5

## 6 **Protein purification**

7 StbA or StbA<sub>1-75</sub> proteins were expressed in *E. coli* Rosetta (DE3) cells (Novagen) carrying  
8 pET-StbA or pET-StbA<sub>1-75</sub>, respectively. Cells were grown at 37°C to an OD<sub>600</sub> nm of  
9 approximately 0,6 and protein expression was induced by addition of IPTG to a final  
10 concentration of 0.5 mM. After 3 hours growth at 37°C, cells were harvested by  
11 centrifugation, resuspended in buffer A (50 mM Tris pH 7.5, 1 M NaCl) and lysed by  
12 sonication. Cell-free extracts, obtained by ultracentrifugation at 4°C for 15 minutes at  
13 150 000 g, were loaded onto a 5-ml Ni-affinity column (HisTrap HP, GE healthcare) and  
14 washed with buffer B (50 mM Tris pH 7.5, 0.5 M NaCl) containing 5 mM and 50mM  
15 Imidazole. Protein was eluted with a 0.05 to 0.5M Imidazole gradient. Fractions  
16 containing the protein were pooled, dialyzed against buffer C (20 mM Tris pH 7.5, 0.2 M  
17 NaCl, 1 mM EDTA) overnight at 4 °C, and then loaded onto a Superdex S75 gel-filtration  
18 column (GE healthcare) and eluted with buffer C. Fractions containing the protein were  
19 pooled and either mixed with cold glycerol (20 % final) and DTT (5 mM) and kept at –  
20 80°C or used directly for crystallization trials.

21 Expression and purification of Selenomethionine substituted StbA<sub>1-75</sub> was performed as  
22 described above with the following modifications: pET- StbA<sub>1-75</sub> was introduced in B834  
23 (DE3) *E. coli* cells (Novagen) and the resulting strain was grown at 37°C in 1 liter of



1 SelenoMet™ Medium Base (Molecular Dimension) supplemented with  
2 selenomethionine and all of the natural amino acids excluding methionine.

3

#### 4 **Structure determination (crystallization, data collection and structure determination)**

5

6 Screening for crystallization conditions was performed using commercially available kits  
7 (Hampton Research). Crystals were grown at 19°C using the sitting-drop vapor diffusion  
8 technique (1 µl protein solution and 1 µl crystallization reagent equilibrated against a  
9 0.5 ml reservoir volume) upon mixing the protein 1:1 with well solution containing 0.1  
10 M Trisodium Citrate Dihydrate pH5.6, 10% (v/v) iso-propanol and 10% (v/v) PEG 4000.

11 Datasets were obtained at beamline PROXIMA at the SOLEIL Synchrotron Radiation  
12 Facility (Gif-Sur-Yvette, France).

13 For data collection, StbASeMet crystals were flash-frozen in liquid nitrogen at 105 K.

14 For single StbA-SeMet crystals, data was collected at 0.9793Å, the wavelength  
15 corresponding to the Selenium absorption maximum according to the fluorescence scan.

16 Diffraction images were processed using XDS (21) and scaled using Scala (22) as part of  
17 the CCP4 package (23). The structure was solved by single anomalous dispersion (SAD)

18 phasing using the program AutoSol of the PHENIX package (24). The refinement of the  
19 initial model was performed through several cycles by Phenix refine (24) until

20 appropriate R factors were reached. Final manual modeling was done in COOT (25). The

21 depiction of structures and analyses were performed with UCSF Chimera, developed by  
22 the Resource for Biocomputing, Visualization, and Informatics at the University of

23 California, San Francisco, with support from NIH P41-GM103311.

24

## 1 **Limited proteolysis**

2 StbA at a concentration of  $1.2 \text{ mg.ml}^{-1}$  was incubated with several amounts of trypsin  
3 (Thermo Fisher Scientific) for different times at  $37^{\circ}\text{C}$ . After trypsin treatment, protein  
4 loading buffer (2X: 0.5 M Tris-HCl [pH 6.8], 4.4% [wt/vol] SDS, 20% [vol/vol] glycerol, 2%  
5 [vol/vol] 2-mercaptoethanol, and bromophenol blue) was added to stop the reaction.  
6 Samples were boiled for 5 min and loaded on a 15% SDS-PAGE. The band corresponding  
7 to the major cleavage product was excised for mass spectroscopy identification.

8

## 9 **Electrophoretic mobility shift assays (EMSA)**

10 Fluorescent DNA substrates were prepared by hybridization of complementary Cy3- or  
11 Cy5-labeled oligonucleotides (Table S2). Fluorescently labeled probes were incubated in  
12 0.5 M Tris-HCl pH7.5 and 0.1 M NaCl at  $95^{\circ}\text{C}$  for 10 min, and slowly cooled down to  $25^{\circ}\text{C}$ .  
13 67 nM of fluorescent DNA substrate was incubated with increasing concentrations of  
14 StbA or StbA1-75 (0 to  $16 \mu\text{M}$ ) in a final volume of  $12 \mu\text{l}$  of binding mixture (10mM Tris-  
15 HCl (pH7.5), 200 mM NaCl, 0.5 mM EDTA and 20% glycerol) with sonicated salmon sperm  
16 DNA as a competitor ( $100 \mu\text{g.ml}^{-1}$ ) for 20 min at  $30^{\circ}\text{C}$ . Reaction mixtures were separated  
17 on a 5% non-denaturing polyacrylamide gel in TGE buffer (25 mM Tris, 25 mM Glycine  
18 and 5 mM EDTA) and analyzed using a Typhoon trio imager (GE Healthcare). For the  
19 short-Long EMSA Assay Coupled to Differential Fluorescent DNA Labeling, the protocol  
20 is as described in (26).

21

## 22 **Transcriptional regulation activity measurements**

23 Reporter plasmids carrying *PstbA*, *Porf7*, *Porf12*, *Porf14* promoters were constructed in  
24 a previous study (7). *stbA* and *stbA*<sub>1-75</sub> genes (encoding the first 75 residues of StbA) were

1 amplified from R388 by PCR with primers StbAsen and StbAasen StbA<sub>1-75</sub>sen and StbA<sub>1-</sub>  
2 <sub>75</sub>asen, respectively, (Table S2) and cloned in plasmid pBAD33 using *Xba*I and *Hind*III  
3 restriction endonucleases to generate pBAD*stbA*<sub>1-75</sub> (Table S1). To determine the effect  
4 of StbA and StbA<sub>1-75</sub>, plasmids pBAD*stbA* and pBAD*stbA*<sub>1-75</sub> were transformed to *E. coli*  
5 Bw27783 containing one of the reporter plasmids. Protein expression was induced by  
6 adding appropriate concentrations of arabinose to M9-broth and fluorescence per OD  
7 unit (GFP/OD) was determined and compared to that produced by the same reporter  
8 strain when containing the empty expression vector pBAD33.

9

## 10 **Microscopy**

11 Live cell microscopy experiments were performed as described in (5) with the following  
12 modifications. To fluorescently label bacterial nucleoid, *E. coli* strain LN2666 was  
13 modified by P1 transduction to carry a *hupA::mcherry* translational fusion that  
14 expresses the nucleoid associated protein HU fused with mCherry (Table S1; (27). Strain  
15 LN2666 Hu-mcherry containing plasmid pALA2705 (Table S1) was transformed with DNA  
16 of plasmid R388::*parS-Cm* (R388) or one of its derivatives. Cells were visualized at 30°C  
17 using an Eclipse TIE/B wide field epifluorescence microscope (Nikon) with a phase  
18 contrast objective (CFI Plan Apo Lbda 100X oil NA1.45) and a Semrock filter FITC (Ex:  
19 482BP35; DM: 506; Em: 536BP40) or mCherry (Ex: 562BP40; DM:593; Em: 641BP75).  
20 Images were acquired using an Andor Neo SCC-02124 camera with illumination at 60%  
21 (FITC) or 25% (mCherry) from a SpectraX source Led (Lumencor) and exposure times of  
22 800 and 100ms respectively for FITC and mCherry. Nis-Elements AR software (Nikon)  
23 was used for image capture and editing. Foci detection and integrated fluorescence  
24 phase-contrast and fluorescence were measured using Coli-Inspector project running

1 under ImageJ software in combination with plugin ObjectJ  
2 (<http://simon.bio.uva.nl/objectj/>). At least 1000 cells were inspected for each  
3 experiment.

4

## 5 **Results**

### 6 **StbA is organized in two domains**

7 Comparative genomic studies previously showed that *stbA* is located in a region of  
8 conserved synteny, adjacent to the origin of transfer of plasmids of several mobility  
9 groups (MOB<sub>F11</sub>, MOB<sub>P11</sub>, MOB<sub>P6</sub>, MOB<sub>P13/P14</sub>) belonging to various PTUs (W, N1, P1, P9,  
10 Q1 and I2) ((5); (3)). In order to gain structural information and assess the diversity of  
11 the StbA proteins, we performed BLASTP searches among all complete prokaryotic  
12 genome sequences available (BLAST+2.11.00) using R388 StbA (Genebank BAD24117)  
13 as a query. We analyzed the genetic neighborhood of the StbA homologs and retained  
14 those for which the synteny of the *stb* and MOB operons was conserved. Results were  
15 then filtered both for redundancy and for keeping a subset of representatives of StbA  
16 diversity (see Materials and methods). Figure 2 displays a multiple sequence alignment  
17 of R388 StbA and 33 other selected StbA protein sequences. StbA proteins are small  
18 proteins of about 150 amino acid residues, ranging from 135 to 175. Analyses from StbA  
19 sequences by using the InterPro and Pfam databases did not reveal any known domain,  
20 motif or protein family except a disordered region encompassing residues 69 to 108.  
21 However, protein sequence comparison showed that the N-terminal half of StbA  
22 displays high degree of conservation (Figure 2A), including several blocks of conserved  
23 residues, while the C-terminal half is poorly conserved (Figure 2B). These data thus  
24 suggest that the StbA proteins are organized in two domains.

1 To experimentally probe the domain organization of R388 StbA, a C-terminally (His)<sub>6</sub>-  
2 tagged version of full-length StbA (16,7 kDa) was subjected to time-limited proteolysis  
3 with trypsin and analyzed by SDS-PAGE. As shown in figure 3, StbA digestion yielded  
4 several discreet proteolytic products (lanes 4-6 and 1-2). The smallest polypeptide band  
5 (P) was the most resistant to proteolysis (lane 2), prior to be fully degraded after ~ 30  
6 min (lane 3). MALDI-TOF spectrometry analysis revealed a fragment of about 10 kDa  
7 that corresponds to residues 1 to 86. No peptide corresponding to the last 55 C-terminal  
8 residues of StbA was detected in the mass analysis, indicating that the C-terminal part  
9 of StbA is a poorly structured region and thus rapidly degraded.

10

#### 11 **Crystal structure of the N-terminal domain of StbA**

12 For a further characterization, we performed structural studies of StbA. The full length  
13 StbA protein was refractory to crystallization, possibly due to its unstructured C-terminal  
14 domain. Thus, we overexpressed and purified the N-terminal domain of StbA, spanning  
15 residues 1 to 75 with a C-terminal His-Tag (StbA<sub>1-75</sub>-HT).

16 We solved the crystal structure of StbA<sub>1-75</sub>-HT at 1.9 Å resolution by single  
17 anomalous dispersion (SAD) using a selenomethionine-derivative protein (Materials and  
18 Methods). The crystal belonged to the space group P3<sub>1</sub> with one molecule per  
19 asymmetric unit. The final model of StbA<sub>1-75</sub> contains 72 residues (Asn<sub>2</sub> to Ala<sub>73</sub>) and 12  
20 water molecules. Data collection and refinement statistics are given in Table 1.

21 The overall architecture of StbA<sub>1-75</sub> is shown in Figure 4A. It shows a simple fold  
22 comprising three α-helical segments with a long N-terminal helix α1 (residues 5–36),  
23 followed by two short helices α2 (residues 41–49) and α3 (residues 57–69). α2 and α3  
24 helices are connected by a sharp turn of 7 residues (residues 51-56, Figure 4A). This fold

1 corresponds to the characteristic triangular outline that defines the tri-helical HTH  
2 domain (for reviews see (28) and (29)). HTH motifs are well-known DNA-binding  
3 domains present in the three super-kingdoms of life. They are found in the most  
4 prevalent transcription regulators of all prokaryotic genomes and are also involved in  
5 various other functions, such as DNA repair, replication and RNA metabolism and also  
6 in plasmid partition (30).

7 StbA HTH motif displays conserved sequence elements that are characteristic of the  
8 HTH fold. The sharp turn between  $\alpha 2$  and  $\alpha 3$ , which is a defining domain of this fold, is  
9 very conserved in the StbA proteins (Figures 2 and S1). It contains a motif Gly<sub>52</sub>-Phe<sub>53</sub>-  
10 Asp<sub>54</sub>, which corresponds to a 'Gha' pattern (where G is a glycine, h a hydrophobic  
11 residue, and an acidic residue), reminiscent of the characteristic 'shs' pattern (where s  
12 is a small residue; (29); Figure S1). Also, other conserved hydrophobic residues point to  
13 the interior of the fold, forming a characteristic hydrophobic core that stabilizes the  
14 domain (residues Met<sub>28</sub>, Ile<sub>31</sub> and Val<sub>35</sub> in  $\alpha 1$ , Ile<sub>44</sub>, Val<sub>45</sub> and Leu<sub>48</sub> in  $\alpha 2$ , and Phe<sub>60</sub> and  
15 Leu<sub>64</sub> in  $\alpha 3$ , Figure 4A).

16 A Dali structural similarity search indicated that StbA<sub>1-75</sub> structure most closely  
17 resembles the winged HTH motif of the transcriptional regulator Rv3488 of  
18 *Mycobacterium tuberculosis* H37Rv, which belongs to the PadR-like family (Figure 4B;  
19 PDB ID: 5ZHC; (31) with a Dali Z-score of 6.4 and an r.m.s. deviation of 2.5 Å (with an  
20 overall sequence identity of 17%).

21 PadR-like transcriptional regulators form a large structurally-related family of  
22 proteins that play roles in diverse biological processes, such as detoxification, virulence,  
23 antibiotic synthesis and multi-drug resistance in various bacterial phyla ((32); (33); (34);  
24 (35); (36); (37)). The AspA CBP of the archeal *sulfolobus* plasmid pNOB8 partitioning

1 system also shows similarity with the PadR proteins (38). The structural similarity  
2 between StbA<sub>1-75</sub> and PadR-like DNA-binding motif indicates that StbA contains a  
3 functional HTH motif.

4 PadR-like regulators share a common fold comprising a highly conserved N-  
5 terminal winged-HTH domain, consisting of three  $\alpha$  helices ( $\alpha$ 1 to  $\alpha$ 3), a two C-terminal  
6  $\beta$ -strand hairpin unit (the wing), and a variable C-terminal module involved in  
7 dimerization. StbA<sub>1-75</sub> lacks the wing, which often provides an additional interface for  
8 DNA contact through charged residues in the hairpin (29). Although full-length StbA  
9 eluted as a dimer in exclusion chromatography, StbA<sub>1-75</sub> appears to be a monomer in  
10 solution (Figure S2). This is consistent with crystallographic data showing that the  
11 asymmetric unit (a.s.u.) contained one StbA<sub>1-75</sub> monomer. On the other hand, our  
12 analyses of StbA<sub>1-75</sub> using the bacterial adenylate cyclase-based bacterial two-hybrid  
13 system showed that it self-associated, indicating that the protein forms multimers *in*  
14 *vivo* (BACTH, Figure S3). Although these observations could result from crystallization  
15 artifacts, the crystal structure shows that the N-terminal part of helix  $\alpha$ 1 of one  
16 monomer packs into a hydrophobic pocket formed between helices  $\alpha$ 1 and  $\alpha$ 2 of  
17 another monomer. Positions of the hydrophobic residues putatively involved in  
18 interactions at the dimer interface, which are mostly conserved in StbA proteins, are  
19 indicated in Figure S4 (Leu<sub>20</sub>, Leu<sub>27</sub>, Ile<sub>31</sub>, Val<sub>39</sub>, Ile<sub>44</sub> and Ile<sub>48</sub> from monomer 1, and Leu<sub>7</sub>,  
20 Ile<sub>11</sub> and Ile<sub>14</sub> from monomer 2). The crystals showed a three-fold symmetry between  
21 three identical subunits. Although this observation may be an artifact due to  
22 crystallization and/or the absence of the C-terminal domain of StbA, it suggests that  
23 StbA<sub>1-75</sub> monomers may interact as trimers. In the structure, a hydrogen bond formed  
24 by Asp<sub>5</sub> from monomer 1 and Lys<sub>69</sub> from monomer 3 may stabilize the interactions

1 between dimers (Figure S4B). Oligomerization of StbA may also involve the C-terminal  
2 domain of the protein, as described for several PadR-like proteins ((38); (39); (36); (31);  
3 (40)).

4 The third helix,  $\alpha 3$ , is known as the recognition helix that inserts into the major  
5 groove of the DNA to form the primary protein-DNA interface (41). As shown in Figure  
6 2, StbA  $\alpha 3$  contains mainly conserved polar residues (Asn<sub>56</sub>, Thr<sub>59</sub>, Ser<sub>62</sub>), including  
7 several positively charged residues (Arg<sub>61</sub>, Arg<sub>66</sub>, Arg<sub>68</sub> and Lys<sub>69</sub>), which are presumably  
8 involved in specific protein-DNA interactions. The electrostatic model presented in  
9 Figure 4C shows that StbA<sub>1-75</sub> displays a large highly positively charged surface extending  
10 over the whole side of the protein exposing  $\alpha 3$ , which contains many basic amino  
11 residues. These are contributed from  $\alpha 3$  (see above) and also the N-terminus of  $\alpha 1$   
12 (Arg<sub>10</sub>, Arg<sub>15</sub>, Arg<sub>17</sub> and Arg<sub>25</sub>), which suggests that  $\alpha 1$  could be involved in additional  
13 protein-DNA contacts with the minor groove of the DNA. Consistently, Arg<sub>25</sub> and Arg<sub>17</sub>  
14 are pretty well conserved (Figure 2). This putative DNA attachment site involving the N-  
15 terminus of  $\alpha 1$  is characteristic of the HTH motif of the homeodomain family (28).  
16 Notably, the structure of StbA N-terminal domain resembles the homeodomain fold ENT  
17 of the eukaryotic protein EMSY (Z-score 5.0, rmsd=4.9) (42).

18

### 19 **StbA binding on the *stbDRs***

20 StbA was shown *in vitro* to bind specifically to a 200-bp DNA substrate containing the  
21 two sets of five *stbDR* representing *stbS* (5). To further analyze the DNA binding  
22 properties of StbA to the *stbDR* sites, we tested by EMSA its ability to bind different  
23 numbers of the *stbDR* consensus sequence 5'-T/CTGCATCAT on 80-bp DNA fragments  
24 (see figure 1) in the presence of an excess of non-specific competitor DNA (Figure 5).



1 Incubation of increasing amounts of StbA with the DNA substrate carrying a single *stbDR*  
2 (*stb1*, Figure 5A), but not with none (*stb0*, Figure 5A), gave rise to a smear, indicating  
3 specific but unstable interactions (lanes 3-6). Band shifts observed at the highest  
4 concentration of StbA (16  $\mu$ M; Figure 5A, *stb1*, lanes 7) were considered as non-specific  
5 binding since they were also present with the *stb0* DNA substrate (Figure 5A, *stb0*, lane  
6 7). Then, complexes formed at this highest concentration of StbA were difficult to  
7 interpret since they probably include both non-specific complexes and specific  
8 complexes (lanes 7).

9         With the DNA substrate carrying 2 *stbDR* (separated by 2 bp as observed in the  
10 *StbDR* region), a discrete complex was readily observed (CI, *stb2*, Figure 5A, lanes 2-5),  
11 suggesting that StbA binds to two contiguous *stbDR* sites with cooperativity. However,  
12 the substrate including 2 *stbDR* separated by a longer spacer (43 bp) (*stb2'*, Figure S5A)  
13 gave rise to a smear, i.e. a similar pattern as observed with *stb1*, showing that 2 *stbDR*  
14 sequences close to each other are required to form stable complexes (*stb2*, lanes 2-5).  
15 Addition of a third *stbDR* site gave rise to another band (BI) migrating slower than CI (BI,  
16 *stb3*, lanes 5-6). The smear between BI and CI, and the remaining of free substrate at  
17 high StbA concentrations suggested that the interactions between StbA and the DNA  
18 substrates carrying 3 *stbDR* are less stable than with 2 *stbDR* (compare *stb2* and *stb3*,  
19 lanes 4-6). We next examined the binding of StbA to a DNA substrate carrying 5  
20 consensus *stbDR* (*stb5*, figure 5B). Two major complexes were observed: the major  
21 discreet one (CII) displayed an electrophoretic mobility lower than CI, and the second  
22 one migrating slower (BII, left panel, lanes 2-6). These data suggest that StbA binds with  
23 high cooperativity as a dimer to 2 *StbDR* (CI), and two dimers to 4 *StbDR* (CII). According  
24 to this hypothesis, BI and BII could therefore correspond to less stable complexes

1 including an additional dimer bound to the remaining *StbDR* in *stb3* and *stb5*,  
2 respectively.

3 We next tested two other probes carrying 5 *stbDR* but with the 5 *stbDRs* included  
4 in the first or the second array of *stbS*, *stb5a* and *stb5b*, respectively. *Stb5a* and *Stb5b*  
5 substrates gave rise to a similar pattern to that observed with *stb5* with two major  
6 complexes that might correspond to CII and BII (Figure 5B, central panel). With *stb5b*,  
7 which is smaller (60 bp), one more major complex migrating faster is observed (lanes 2-  
8 6, Figure 5B, right panel). Notably, free unbound substrate was observed at high *StbA*  
9 concentrations (lanes 5-7) only with *stb5*, which carries five consensus *stbDR*. These  
10 results suggest that the three substrates carrying 5 *stbDRs* are not equivalent and that  
11 the differences in the *stbDR* sequences of *stbS* have an impact on *StbA* binding, the ones  
12 carrying only two consensus sites and representing the wild-type configurations being  
13 more active.

14 Notably, additional band shifts migrating very slowly (above BI) are observed at  
15 the highest concentrations of *StbA* with *stb2* (*stb2*, lanes 5 and 6). Such low mobility  
16 band shifts were also observed with substrates *stb5*, *stb5a* and *stb5B*. These might arise  
17 from interactions between two complexes CI, forming ‘sandwich complexes’, which  
18 would contain two DNA molecules. In this view, the two arrays of five *stbDRs* that  
19 compose *stbS* might be bridged together upon binding by *StbA*. To investigate such  
20 possibility, we employed the short–Long EMSA coupled to differential fluorescent DNA  
21 labeling method (26). We incubated *StbA* with a mixture of *stb5a* (CY5-labeled, 80 bp)  
22 and *stb5b* (CY3-labeled, 60bp) substrates. As shown in figure S5B (right panel), no  
23 additional complexes were detected in these conditions, thereby ruling out the  
24 possibility of *StbA*-bound ‘sandwich’ complexes composed of two distinct DNA

1 molecules. The sandwich was neither detectable with *stb5* mixed with *stb1*, *stb2*, *stb3*,  
2 nor with *stb2'* substrates (Figure S5C).

3 Altogether these results demonstrate that StbA bound the *stbDR* region in a  
4 sequence-specific and concentration-dependent manner. They also strongly suggest  
5 that StbA binds cooperatively to 2 consecutive *stbDR* as a dimer and to 4 consecutive  
6 *stbDR* as two dimers, forming complexes with different stoichiometries.

7

### 8 **Specific DNA-binding activity of StbA to *stbDR* resides in its N-terminal domain**

9 To examine the role of the HTH DNA-binding motif contained in the N-terminal  
10 domain of StbA, EMSA were conducted using the StbA<sub>1-75</sub> protein, a variant truncated  
11 for the C-terminal domain. As shown in Figure 5C, the StbA<sub>1-75</sub> protein gave rise to similar  
12 patterns as those observed with StbA. No discrete band revealing stable complex  
13 formation was readily generated with a single *stbDR* (left panel, lanes 2-5). Interestingly,  
14 a slow-migrating complex was observed at high concentration of StbA (lane 6). As  
15 hypothesized above, this might correspond to interactions between complexes CI,  
16 although such 'sandwiches' could not be detected (figures S5B and C, and see above).  
17 Stable complexes equivalent to CI readily appeared with DNA substrates carrying 2  
18 *stbDR* (*stb2*, central panel) and 3 *stbDR* (*stb3*, right panel). A second band corresponding  
19 to BI was also detected with *stb3* (lanes 5 and 6). As observed with full-length StbA,  
20 incubation of StbA<sub>1-75</sub> with *stb5a* generated mostly the complexes CII (Figure S5D, lanes  
21 2-5). We thus concluded that the HTH motif included in the 75 N-terminal residues of  
22 StbA carries the specific and cooperative DNA binding activity of the protein.

23

### 24 **The transcriptional repressor activity of StbA is contained in its N-terminal domain**

1           To investigate the role of the N-terminal domain of StbA in transcriptional  
2 repression, we performed transcriptional analyses of four StbA-repressed promoters  
3 containing 2, 3, 5 or 10 *stbDR* sequences (the *orf14*, *orf7*, *orf12*, and *stbA* of R388,  
4 respectively, Figure 1 and S6) in the presence of either StbA or StbA<sub>1-75</sub>. We compared  
5 the activity of these promoters in *E. coli* strains carrying a derivative of pUA66 vector  
6 (Zaslaver et al., 2006) that drives transcription of the *gfpmut2* reporter gene under the  
7 control of one of the *stbDR*-containing promoters, and a pBAD33 derivative expressing  
8 either StbA (pBAD33::*stbA*) or StbA<sub>1-75</sub> (pBAD33::*stbA*<sub>1-75</sub>) (Fernandez-Lopez et al., 2014;  
9 Materials and Methods).

10 Repression rates were linearly related to the increase of the arabinose inducer and thus  
11 to the increase of StbA or StbA<sub>1-75</sub> protein concentrations (Figure S6). As shown in Table  
12 2, StbA<sub>1-75</sub> repressed the activity of all four promoters, indicating that the StbA N-  
13 terminal domain contains the transcriptional repression activity of the protein.

14

#### 15 **Both domains of StbA are required for the control of partition and conjugative transfer** 16 **of plasmid R388**

17           To examine the role of the N-terminal domain of StbA on R388 stability and its  
18 interplay with StbB activity *in vivo*, we constructed a variant of R388 carrying a truncated  
19 *stbA* gene that encodes StbA<sub>1-75</sub> (R388*stbA*<sub>1-75</sub>, Materials and methods). We first  
20 measured plasmid loss rates from serial cultures in non-selective medium, and some of  
21 the results are shown in Figure 6A. R388 wt was highly stable in these conditions, while  
22 R388Δ(*stbA*) was lost at an average rate of  $2.5 \pm 0.7$  % per cell per generation (Figure  
23 6A). R388*stbA*<sub>1-75</sub> was also lost, although at a slightly lower rate (with an average loss of

1 1.3 ± 0.6 %). This result indicated that StbA N-terminal domain stabilizes R388 only  
2 partially *vivo*.

3 Thus, while the StbA N-terminal alone can stabilize R388 to a certain extent, its  
4 C-terminal domain is required for full stability. We then repeated the same experiments  
5 in absence of StbB, which is not involved in R388 wt stability (5). As previously shown,  
6 R388Δ(*stbB*) was as stable as R388 wt, while R388Δ(*stbAB*) was as unstable as  
7 R388Δ(*stbA*) ((5); R388Δ(*stbAB*), 2.3 ± 0.5 %, not shown in Figure 6A). Surprisingly, the  
8 instability provoked by the *stbA*<sub>1-75</sub> mutation was partly suppressed by *stbB* deletion  
9 (R388*stbA*<sub>1-75</sub> Δ(*stbB*), 0.5 ± 0.2 %). This may be linked to a weaker nucleoid-associated  
10 positioning of R388*stbA*<sub>1-75</sub> compared to R388 wt that would render the former more  
11 sensitive to a nucleoid exclusion activity of StbB (see below).

12 StbA was previously found to inhibit or even to fully abolish conjugative transfer  
13 in the presence or absence of StbB, respectively (5). In contrast, StbB has been shown  
14 to stimulate conjugation whether StbA is present or not, whereas the absence of both  
15 StbA and StbB had no effect on conjugation frequencies (5). As confirmed in Figure 6B,  
16 while R388Δ(*stbAB*) exhibited similar conjugation frequencies as R388 wt, inactivation  
17 of StbA led to a significant increase of conjugation frequencies compared to R388 wt,  
18 whereas no conjugation was detected when StbB was inactivated (frequency < 4.10<sup>-3</sup>).  
19 The mechanism by which StbA inhibits conjugation is only partially understood. It  
20 correlates with StbA-dependent positioning of plasmid copies exclusively in the nucleoid  
21 area, which is detrimental for conjugation (5). To study the role of the N-terminal  
22 domain of StbA in the control of conjugation, we measured the conjugation frequencies  
23 of R388*stbA*<sub>1-75</sub>. Interestingly, R388*stbA*<sub>1-75</sub> conjugation frequency was similar to that of  
24 wild-type R388, but significantly lower than that of R388Δ(*stbA*) (Figure 6B). This

1 suggested that StbA<sub>1-75</sub> retained the activity limiting conjugation efficiency. Yet, contrary  
2 to wt, inactivation of StbB in the R388*stbA*<sub>1-75</sub> did not affect its conjugation frequency  
3 (R388*stbA*<sub>1-75</sub> $\Delta$ (*stbB*), Figure 6B). Thus, StbA<sub>1-75</sub> has lost the ability to inhibit conjugation  
4 when StbB is absent.

5

## 6 **The StbA C-terminal domain is required for subcellular localization of plasmid R388**

7

8 To determine whether R388*stbA*<sub>1-75</sub> instability is correlated with an abnormal  
9 subcellular positioning, as previously shown for R388 $\Delta$ (*stbA*), we analyzed the  
10 subcellular localization of the plasmid in live *E. coli* cells using the *parS*/ParB-GFP system  
11 (5). Figure 7A shows representative images of the location of GFP foci position as a  
12 function of the cell length. R388*stbA*<sub>1-75</sub> foci showed a tendency to localize at the cell  
13 center and polar regions, with a pattern resembling that of R388 $\Delta$ (*stbA*). To compare  
14 the localization profile of R388*stbA*<sub>1-75</sub> with R388 and R388 $\Delta$ (*stbA*), we analyzed the  
15 distribution of GFP foci in the length of half-cells divided into five equal sections from  
16 one pole to mid-cell (Figure 7B). R388*stbA*<sub>1-75</sub> foci were found mainly at the cell center  
17 (33% of foci at 0.4 to 0.5 fractional cell length compared to 27% for R388) and within the  
18 most polar region (24% of foci at 0 to 0.1 fractional cell length compared to 12.5% for  
19 R388). However,  $\chi^2$  test revealed that these differences were not highly significant  
20 ( $\chi^2=7.96$ , p-value=0.092). Interestingly, R388 $\Delta$ (*stbA*) and R388*stbA*<sub>1-75</sub> distributions  
21 were also not significantly different ( $\chi^2=4.2$ , p-value=0.380), while R388 $\Delta$ (*stbA*) and  
22 R388 were ( $\chi^2=10.9$ , p-value=0.027). These data indicated that R388*stbA*<sub>1-75</sub> displays  
23 partial activity in the cellular positioning of plasmid copies, possibly correlated with  
24 plasmid instability but less severe than that of R388 $\Delta$ (*stbA*). Noteworthy, R388*stbA*<sub>1-75</sub>

1 foci showed a tendency to localize less frequently at the most polar region of the cell  
2 than R388 $\Delta(stbA)$  foci (42% compared to 57%, respectively, at 0 to 0.2 fractional cell  
3 length), but more at mid-cell (23% compared to 33%, respectively, at 0 to 0.2 fractional  
4 cell length). In contrast to R388 $\Delta(stbB)$  foci, which were previously shown to localize  
5 exclusively to nucleoid areas and not at the cell poles (5), the localization pattern of  
6 R388 $\Delta stbA_{1-75}(stbB)$  was similar to that of R388 $\Delta stbA_{1-75}$ . Thus, plasmid localization  
7 correlated with conjugation efficiency, as deletion of *stbB*, which leads both to retention  
8 of plasmid copies in the nucleoid and abolition of transfer in the presence of StbA (5),  
9 did not affect conjugation frequencies in the R388 $\Delta stbA_{1-75}$  mutant compared to R388  
10 wt (Figure 6B).

11 Altogether, our data suggest that, while StbA N-terminal DNA-binding domain  
12 displays partial activity, both domains of StbA are required for proper positioning of  
13 R388 copies, correlating with plasmid stability and the control of conjugation.

14

## 15 **DISCUSSION**

16

17 The segregation system of plasmid R388 differs from the bacterial systems  
18 described, in that it consists only in a single centromere-binding protein, StbA, to achieve  
19 effective partition of a low-copy-number plasmid. StbA is multifunctional, since it also  
20 plays a key role in the regulation of the expression of several R388 genes and in the  
21 control of conjugation. Our study provides the first structural and biochemical report of  
22 a member of the StbA family of proteins. We show that StbA is a two-domain protein,  
23 of which the N-terminal domain, StbA<sub>1-75</sub>, contains an HTH motif that supports all the  
24 specific DNA-binding activity of the protein, and correlate this with StbA activities *in vivo*.

1 StbA activities involved in the stable inheritance and in the inhibition of conjugation  
2 of plasmid R388 have previously been correlated with the confinement of plasmids at  
3 nucleoid areas (5). Our data indicate that its N-terminal domain displays partial activity  
4 that also correlate with the subcellular positioning of the plasmid. First, we show that  
5 R388*stbA*<sub>1-75</sub> is unstable but to a lesser extent than R388Δ(*stbA*) (Figure 6A), which  
6 correlates with the sub-cellular positioning of R388*stbA*<sub>1-75</sub> being in-between that of the  
7 plasmids R388 and R388Δ(*stbA*) (Figures 6B and 7). Deletion of the C-terminal domain  
8 of StbA could thus alter the interactions between StbA and the nucleoid, resulting in  
9 poor retention of plasmids at the nucleoid and therefore increased plasmid loss. Second,  
10 our results indicate that R388*stbA*<sub>1-75</sub> conjugation frequencies are similar to that of R388  
11 wt, and much lower to that of R388Δ(*stbA*), demonstrating that StbA<sub>1-75</sub> retains the  
12 ability to inhibit conjugation (figure 6). However, StbB, which is strictly required for  
13 conjugation in the presence of StbA, is not essential in the absence of the StbA C-  
14 terminal domain. Again, this correlates with plasmid localization since conjugation  
15 events can be attributed to the copies of the plasmid not being effectively maintained  
16 at the nucleoid by StbA<sub>1-75</sub>. However, there are twice as many copies of R388*stbA*<sub>1-75</sub> as  
17 R388 at the cell poles (figure 7), and one could expect higher levels of transfer of  
18 R388*stbA*<sub>1-75</sub>, as observed for R388Δ(*stbA*). This indicates that the control of conjugation  
19 can probably not only be attributed to the subcellular positioning of the plasmids, but  
20 also to the binding of StbA to R388 *per se*. In this view, StbB could interact with C-  
21 terminal domain of StbA to stimulate conjugation by releasing the plasmid from StbA.  
22 We conclude that, whatever the way StbA positions plasmid copies at the nucleoid, its  
23 C-terminal domain is likely to be required and could interact with StbB to control  
24 conjugation. Third, we demonstrate that StbA<sub>1-75</sub> exhibits partial repression activity on



1 the *stbDR*-bearing promoters of several R388 genes, suggesting that the C-terminus of  
2 StbA might stabilise interactions between StbA and the *stbDR* sites (Table 2 and Figure  
3 S6).

4 The StbA N-terminal domain includes a well-conserved DNA-binding domain that  
5 folds into an HTH motif not predicted *in silico* based on sequence homology and  
6 structure prediction programs. StbA HTH motif consists of the widely spread basic tri-  
7 helical version of the HTH domain, found in many proteins, such as bacterial  
8 transcription factors of the FIS family, or the eukaryotic Homeo, POU and Myb domains  
9 (29). StbA N-terminal domain is structurally most related to the HTH motif of the protein  
10 Rv3488 (31), which belongs to the PadR subfamily II of transcription regulators, including  
11 small proteins, like StbA, of ~ 110 amino acids protein, such as LmrR (36), BcPadR1 and  
12 BcPadR2 (32). These proteins harbor a conserved HTH motif, called winged-HTH because  
13 it comprises at the C-terminus of the recognition helix  $\alpha_3$ , two  $\beta$ -strands devoted to bind  
14 with the operator DNA, and a short C-terminal domain containing a single  $\alpha$ -helix (Figure  
15 4B). Like most bacterial transcription factors, structurally characterized PadR subfamily  
16 II proteins form dimers via a two-fold symmetry in the crystal. In the dimeric structures,  
17 the C-terminal helix flanking the winged HTH motif of one monomer interacts with  
18 structural parts of the HTH motif of the other monomer ((31); (32); (43); (36); (44);  
19 (45)).

20 Our data *in vitro* indicate that StbA binds specifically to the *stbDR* sequences with a  
21 strong cooperativity that lead to the binding of one StbA dimer to every two *stbDR*  
22 (Figures 5 and S5). Full-length StbA is indeed dimeric in solution, but, in contrast, StbA  
23 N-terminal domain (StbA<sub>1-75</sub>) is monomeric (Figure S2). Yet, StbA<sub>1-75</sub> shows similar  
24 specific and cooperative binding patterns to the *stbDR* as the full-length StbA, suggesting

1 that interactions between StbA<sub>1-75</sub> monomers may be promoted by binding to DNA.  
2 Although binding cooperativity to DNA often involves direct protein–protein  
3 interactions, binding of StbA<sub>1-75</sub> monomers could be promoted by local protein-induced  
4 changes in DNA shape that would create an optimized DNA conformation for binding of  
5 the second protein (46). Also, our structural data reveal a putative dimerization interface  
6 involving hydrophobic interactions between  $\alpha$ 1 of one monomer and  $\alpha$ 2 of the other  
7 monomer (Figure S3), which is consistent with our bacterial two-hybrid assays results  
8 showing that StbA N-terminal domain interacts with itself *in vivo* (Figure S2). Altogether,  
9 these observations suggest that StbA C-terminal part, unlike PadR proteins, may not be  
10 involved in oligomerization, or could just have a role in stabilizing StbA multimers.

11 By analogy to all plasmids and chromosomal CBPs described so far, StbA might  
12 assemble into high-order complexes at its centromere-like site. Our results indicate that  
13 *in vitro*, StbA and StbA<sub>1-75</sub> form specific high molecular weight complexes. These could  
14 arise from the association of monomers of the StbA N-terminal domain to form high-  
15 order multimer through intermolecular hydrophobic interactions and hydrogen bonds,  
16 as suggested by the structural data. Another possibility could be the assembly of  
17 complexes comprising different pieces of *stbDR*-carrying DNA, as might be evoked by  
18 the organization of *stbS* in two arrays of 5 *stbDR*. Our EMSA did not allow to detect  
19 complexes containing two separate DNA molecules carrying *StbDR* sites. These data  
20 however do not rule out the possibility the formation of a sandwich complex that bring  
21 together the two *stbDR* arrays of *stbS* inside the same DNA molecule *in vivo*.

22 *StbDR* sequences are spaced with 2 bp, which forms an 11-bp cycle corresponding  
23 to a full helix turn, suggesting that the StbA dimers bind to the same side of the DNA.  
24 This has been observed for the CBP ParR of plasmids pB171 and pSK41, which assemble

1 in a cooperative manner in a continuous structure on their cognate centromere that is  
2 organized very similarly to *stbS* ((47); (48)). *StbS* organization and its location upstream  
3 the *stb* operon, as well as the fact that *StbA* carries an HTH DNA-binding domain are also  
4 reminiscent characteristics of type III partitioning systems, of which the most studied  
5 system is *tubRZC* of *Bacillus thuriengensis* plasmid pBtoxis ((49);(2)). According to this,  
6 *StbA* may form a large DNA-protein filament structure around the two sets of *stbDR* of  
7 *stbS*, as observed for *TubR* proteins around the seven 12-bp direct repeats arranged in  
8 two sets forming *tubC* ((50) ; (51); (52)). Similarly, the CBP *AspA* of the archeal plasmid  
9 pNOB8, which shows like *StbA* homology with the *PadR* family of transcriptional  
10 regulators, spreads onto DNA forms a protein-DNA superhelical structure (38).

11 As all the plasmid *par* operons, the *stb* operon is autoregulated. *StbA* regulates the  
12 expression of its own promoter and also four others promoters of genes located in the  
13 maintenance region of plasmid R388 (7). We show here that *StbA* forms stable specific  
14 complexes with DNA substrates carrying at least two direct repeats of *stbDR* *in vitro*.  
15 This might be biologically relevant since *StbA* operator regions consist in arrays of two,  
16 three or five direct repeats of *stbDR*, with the exception of *stbS*, which contains ten  
17 *stbDR* arranged in two sets in the *stbA* promoter. This dual role of *StbA* to act as a  
18 transcriptional repressor of its operon, and of other unrelated genes, and also as R388  
19 CBP, raises the question of how *stbS*, which is strictly required for plasmid stability, is  
20 recognized by *StbA* as a segregation site. The CBP of plasmid RK2, *KorB*, also regulates  
21 many genes on the plasmid, including the partition genes *incC* and *korB*. *KorB* recognizes  
22 and binds to a palindromic operator found 12 times on plasmid RK2 (OB1-OB12). In  
23 contrast to *stbS*, the OB3 site, is required for RK2 partition but is not involved in the  
24 regulation of the expression of the partition genes, which is achieved through *KorB*

1 binding to OB1, flanking the -35 sequence (53). Previous study showed that the  
2 presence of the other *stbDR* in the promoter of several R388 genes is not sufficient to  
3 ensure R388 stability, indicating that this arrangement in two sets of *stbDR* arrays is  
4 important for segregation (5). Notably, the loss rates of R388 deleted of *stbS* is similar  
5 to that of plasmid R388*stbA*<sub>1-75</sub>, which might suggest that the formation of the  
6 segregation complex requires the arrangement of the two sets of *stbDR* of the *stbS* and  
7 requires the C-terminal domain of StbA.

8 We aim to understand the trade-offs resulting from the multiple roles of StbA in  
9 plasmid R388 physiology. In contrast to typical partition operons, the other genes of the  
10 *stb* operon, *stbB* and *stbC*, are not required for plasmid stability. We speculate that the  
11 ATPase StbB could counteract StbA activity by releasing R388 copies from the nucleoid  
12 through interactions with StbA and/or other factors. Conjugation and stability seem to  
13 be competing mechanisms in plasmid R388 molecular physiology. We speculate that the  
14 R388 segregation system involving a single centromere-binding protein might represent  
15 an ancestral mechanism, from which the typical Par systems originated. These might  
16 have co-opted a dedicated NTPase to improve partition by moving the partition  
17 complexes polewards and thus make partition and conjugation more uncoupled  
18 processes.

19 Putative host partners of the StbA/*stbS* system and the associated mechanism for  
20 R388 segregation are currently unknown, as well as the way by which StbB controls  
21 conjugation. This knowledge will be crucial to understand how StbA controls vertical and  
22 horizontal transfer of plasmid R388. PTU-W plasmids, including the three typical  
23 members R388, pSa and R7K are among the broadest host range plasmids in  
24 Proteobacteria. Their successful transfer and stable inheritance have been reported in

1 many bacterial species, including all the ‘ESKAPE’ pathogens ((54); (8)). These plasmids  
2 are good examples for the acquisition of antibiotic resistance genes as a consequence of  
3 the pressure exerted by antibiotic usage (55). Our studies point out that a single mutation  
4 in the *stbA* gene could generate plasmids with much higher transfer ability (5), thus  
5 alarming on the possible emergence of such ‘superspreader’ plasmids. It has recently  
6 been reported that an effective approach to limit the spread of antibiotic resistance  
7 genes would be the combination of the control of plasmid transmission by conjugation  
8 (reviewed in (56) and (57)) and fostering plasmid loss (58). In this view, the StbAB  
9 system, which controls the interplay between plasmid conjugation and segregation may  
10 be an interesting target. Understanding the mechanisms of integration of vertical and  
11 horizontal modes of plasmid propagation within bacterial populations is of utmost  
12 importance given that they are major contributors to the spread of antibiotic resistance  
13 (59).

14

## 15 **Data Availability**

16 Atomic coordinates and structure factors for the reported crystal structure of StbA have  
17 been deposited in the Protein Data bank with accession number 7PC1.

18

## 19 **Supplementary data**

### 20 **Supplementary materials and methods**

21 Bacterial-two-hybrid analysis (BACTH).

22 Size exclusion chromatography

### 23 **Supplementary figures**

24 Table S1. Strains and plasmids

- 1 Table S2. Oligonucleotides used in this study
- 2 Table S3. Sequence ID of proteins used in Figure 2
- 3 Figure S1. WebLogo of amino-acid sequences of the turn between  $\alpha 2$  and  $\alpha 3$  of StbA
- 4 proteins.
- 5 Figure S2. Gel filtration chromatography analysis of purified StbA and StbA<sub>1-75</sub>.
- 6 Figure S3. StbA and StbA<sub>1-75</sub> dimerization *in vivo* in the BACTH system.
- 7 Figure S4. Crystallographic analysis of StbA multimerization.
- 8 Figure S5. DNA-binding activities of StbA and StbA<sub>1-75</sub> by electrophoretic mobility shift
- 9 assay (EMSA).
- 10 Figure S6. Transcriptional repression activity of StbA and StbA<sub>1-75</sub> on several *stbDR*-
- 11 carrying promoters of plasmid R388.

12

### 13 **Fundings**

14 This work was supported by the Spanish Ministry of Economy, Industry and  
15 Competitiveness grant BFU2017-86378-P to F.dI.C., by the Spanish Ministry of Science  
16 (MCI/AEI/FEDER,UE) grant PGC2018-093885-B-I00 to G.M., by French National Research  
17 Agency, grant number ANR-18-CE35-0008 to J.-Y.B. and by University P. Sabatier grant  
18 to C.G..

19

### 20 **Acknowledgments**

21 Structural experiments were performed at PROXIMA beamline at the SOLEIL  
22 Synchrotron (France) with the collaboration of Beatrix Guimaraes. We thank all  
23 members of the GeDy team for fruitful discussions.

24

### 25 **References**

1

- 2 1. Guynet,C. and de la Cruz,F. (2011) Plasmid segregation without partition. *Mob Genet*  
3 *Elements*, **1**, 236–241.
- 4 2. Bouet,J.-Y. and Funnell,B.E. (2019) Plasmid Localization and Partition in  
5 Enterobacteriaceae. *EcoSal Plus*, **8**.
- 6 3. Redondo-Salvo,S., Fernández-López,R., Ruiz,R., Vielva,L., de Toro,M.,  
7 Rocha,E.P.C., Garcillán-Barcia,M.P. and de la Cruz,F. (2020) Pathways for  
8 horizontal gene transfer in bacteria revealed by a global map of their plasmids.  
9 *Nat Commun*, **11**, 3602.
- 10 4. Simpson,A.E., Skurray,R.A. and Firth,N. (2003) A single gene on the staphylococcal  
11 multiresistance plasmid pSK1 encodes a novel partitioning system. *J Bacteriol*,  
12 **185**, 2143–2152.
- 13 5. Guynet,C., Cuevas,A., Moncalián,G. and de la Cruz,F. (2011) The stb operon  
14 balances the requirements for vegetative stability and conjugative transfer of  
15 plasmid R388. *PLoS Genet*, **7**, e1002073.
- 16 6. Planchenault,C., Pons,M.C., Schiavon,C., Siguier,P., Rech,J., Guynet,C., Dauverd-  
17 Girault,J., Cury,J., Rocha,E.P.C., Junier,I., *et al.* (2020) Intracellular Positioning  
18 Systems Limit the Entropic Eviction of Secondary Replicons Toward the  
19 Nucleoid Edges in Bacterial Cells. *J Mol Biol*, **432**, 745–761.
- 20 7. Fernandez-Lopez,R., Del Campo,I., Revilla,C., Cuevas,A. and de la Cruz,F. (2014)  
21 Negative feedback and transcriptional overshooting in a regulatory network for  
22 horizontal gene transfer. *PLoS Genet*, **10**, e1004171.
- 23 8. Fernández-López,R., Garcillán-Barcia,M.P., Revilla,C., Lázaro,M., Vielva,L. and de  
24 la Cruz,F. (2006) Dynamics of the IncW genetic backbone imply general trends  
25 in conjugative plasmid evolution. *FEMS Microbiol Rev*, **30**, 942–966.
- 26 9. Gruber,C.J., Lang,S., Rajendra,V.K.H., Nuk,M., Raffl,S., Schildbach,J.F. and  
27 Zechner,E.L. (2016) Conjugative DNA Transfer Is Enhanced by Plasmid R1  
28 Partitioning Proteins. *Front Mol Biosci*, **3**, 32.
- 29 10. Mitura,M., Lewicka,E., Godziszewska,J., Adamczyk,M. and Jagura-Burdzy,G.  
30 (2021) Alpha-Helical Protein KfrC Acts as a Switch between the Lateral and  
31 Vertical Modes of Dissemination of Broad-Host-Range RA3 Plasmid from IncU  
32 (IncP-6) Incompatibility Group. *Int J Mol Sci*, **22**, 4880.
- 33 11. Yu,D., Ellis,H.M., Lee,E.C., Jenkins,N.A., Copeland,N.G. and Court,D.L. (2000)  
34 An efficient recombination system for chromosome engineering in *Escherichia*  
35 *coli*. *Proc Natl Acad Sci U S A*, **97**, 5978–5983.
- 36 12. Lee,E.C., Yu,D., Martinez de Velasco,J., Tessarollo,L., Swing,D.A., Court,D.L.,  
37 Jenkins,N.A. and Copeland,N.G. (2001) A highly efficient *Escherichia coli*-  
38 based chromosome engineering system adapted for recombinogenic targeting  
39 and subcloning of BAC DNA. *Genomics*, **73**, 56–65.

- 1 13. Sambrook,J. and Russell,D. (2001) *Molecular Cloning: A Laboratory Manual* 3 rd.  
2 Cold Spring Laboratory Press, NY.
- 3 14. Blum,M., Chang,H.-Y., Chuguransky,S., Grego,T., Kandasamy,S., Mitchell,A.,  
4 Nuka,G., Paysan-Lafosse,T., Qureshi,M., Raj,S., *et al.* (2021) The InterPro  
5 protein families and domains database: 20 years on. *Nucleic Acids Res*, **49**,  
6 D344–D354.
- 7 15. Mistry,J., Chuguransky,S., Williams,L., Qureshi,M., Salazar,G.A.,  
8 Sonnhammer,E.L.L., Tosatto,S.C.E., Paladin,L., Raj,S., Richardson,L.J., *et al.*  
9 (2021) Pfam: The protein families database in 2021. *Nucleic Acids Research*, **49**,  
10 D412–D419.
- 11 16. Thompson,J.D., Higgins,D.G. and Gibson,T.J. (1994) CLUSTAL W: improving the  
12 sensitivity of progressive multiple sequence alignment through sequence  
13 weighting, position-specific gap penalties and weight matrix choice. *Nucleic  
14 Acids Res*, **22**, 4673–4680.
- 15 17. Larkin,M.A., Blackshields,G., Brown,N.P., Chenna,R., McGettigan,P.A.,  
16 McWilliam,H., Valentin,F., Wallace,I.M., Wilm,A., Lopez,R., *et al.* (2007)  
17 Clustal W and Clustal X version 2.0. *Bioinformatics*, **23**, 2947–2948.
- 18 18. Waterhouse,A.M., Procter,J.B., Martin,D.M.A., Clamp,M. and Barton,G.J. (2009)  
19 Jalview Version 2--a multiple sequence alignment editor and analysis  
20 workbench. *Bioinformatics*, **25**, 1189–1191.
- 21 19. Afgan,E., Baker,D., Batut,B., van den Beek,M., Bouvier,D., Cech,M., Chilton,J.,  
22 Clements,D., Coraor,N., Grüning,B.A., *et al.* (2018) The Galaxy platform for  
23 accessible, reproducible and collaborative biomedical analyses: 2018 update.  
24 *Nucleic Acids Res*, **46**, W537–W544.
- 25 20. Yates,P., Lane,D. and Biek,D.P. (1999) The F plasmid centromere, sopC, is required  
26 for full repression of the sopAB operon. *J Mol Biol*, **290**, 627–638.
- 27 21. Kabsch,W. (2010) XDS. *Acta Crystallogr D Biol Crystallogr*, **66**, 125–132.
- 28 22. Evans,P. (2006) Scaling and assessment of data quality. *Acta Crystallogr D Biol  
29 Crystallogr*, **62**, 72–82.
- 30 23. Winn,M.D., Ballard,C.C., Cowtan,K.D., Dodson,E.J., Emsley,P., Evans,P.R.,  
31 Keegan,R.M., Krissinel,E.B., Leslie,A.G.W., McCoy,A., *et al.* (2011) Overview  
32 of the CCP4 suite and current developments. *Acta Crystallogr D Biol  
33 Crystallogr*, **67**, 235–242.
- 34 24. Adams,P.D., Afonine,P.V., Bunkóczi,G., Chen,V.B., Davis,I.W., Echols,N.,  
35 Headd,J.J., Hung,L.-W., Kapral,G.J., Grosse-Kunstleve,R.W., *et al.* (2010)  
36 PHENIX: a comprehensive Python-based system for macromolecular structure  
37 solution. *Acta Crystallogr D Biol Crystallogr*, **66**, 213–221.
- 38 25. Emsley,P. and Cowtan,K. (2004) Coot: model-building tools for molecular graphics.  
39 *Acta Crystallogr D Biol Crystallogr*, **60**, 2126–2132.



- 1 26. Guynet,C., Nicolas,E., Ton-Hoang,B., Bouet,J.-Y. and Hallet,B. (2020) First  
2 Biochemical Steps on Bacterial Transposition Pathways. *Methods Mol Biol*,  
3 **2075**, 157–177.
- 4 27. Marceau,A.H., Bahng,S., Massoni,S.C., George,N.P., Sandler,S.J., Mariani,K.J. and  
5 Keck,J.L. (2011) Structure of the SSB-DNA polymerase III interface and its role  
6 in DNA replication. *EMBO J*, **30**, 4236–4247.
- 7 28. Wintjens,R. and Rooman,M. (1996) Structural classification of HTH DNA-binding  
8 domains and protein-DNA interaction modes. *J Mol Biol*, **262**, 294–313.
- 9 29. Aravind,L., Anantharaman,V., Balaji,S., Babu,M.M. and Iyer,L.M. (2005) The  
10 many faces of the helix-turn-helix domain: transcription regulation and beyond.  
11 *FEMS Microbiol Rev*, **29**, 231–262.
- 12 30. Funnell,B.E. (2016) ParB Partition Proteins: Complex Formation and Spreading at  
13 Bacterial and Plasmid Centromeres. *Front Mol Biosci*, **3**, 44.
- 14 31. Kumari,M., Pal,R.K., Mishra,A.K., Tripathi,S., Biswal,B.K., Srivastava,K.K. and  
15 Arora,A. (2018) Structural and functional characterization of the transcriptional  
16 regulator Rv3488 of Mycobacterium tuberculosis H37Rv. *Biochem J*, **475**,  
17 3393–3416.
- 18 32. Fibriansah,G., Kovács,Á.T., Pool,T.J., Boonstra,M., Kuipers,O.P. and  
19 Thunnissen,A.-M.W.H. (2012) Crystal structures of two transcriptional  
20 regulators from Bacillus cereus define the conserved structural features of a  
21 PadR subfamily. *PLoS One*, **7**, e48015.
- 22 33. Morabbi Heravi,K., Lange,J., Watzlawick,H., Kalinowski,J. and Altenbuchner,J.  
23 (2015) Transcriptional regulation of the vanillate utilization genes (vanABK  
24 Operon) of Corynebacterium glutamicum by VanR, a PadR-like repressor. *J*  
25 *Bacteriol*, **197**, 959–972.
- 26 34. Nguyen,T.K.C., Tran,N.P. and Cavin,J.-F. (2011) Genetic and biochemical analysis  
27 of PadR-padC promoter interactions during the phenolic acid stress response in  
28 Bacillus subtilis 168. *J Bacteriol*, **193**, 4180–4191.
- 29 35. Flórez,A.B., Álvarez,S., Zabala,D., Braña,A.F., Salas,J.A. and Méndez,C. (2015)  
30 Transcriptional regulation of mithramycin biosynthesis in Streptomyces  
31 argillaceus: dual role as activator and repressor of the PadR-like regulator MtrY.  
32 *Microbiology (Reading)*, **161**, 272–284.
- 33 36. Madoori,P.K., Agustiandari,H., Driessen,A.J.M. and Thunnissen,A.-M.W.H. (2009)  
34 Structure of the transcriptional regulator LmrR and its mechanism of multidrug  
35 recognition. *EMBO J*, **28**, 156–166.
- 36 37. Hauf,S., Herrmann,J., Miethke,M., Gibhardt,J., Commichau,F.M., Müller,R.,  
37 Fuchs,S. and Halbedel,S. (2019) Aurantimycin resistance genes contribute to  
38 survival of Listeria monocytogenes during life in the environment. *Mol*  
39 *Microbiol*, **111**, 1009–1024.

- 1 38. Schumacher, M.A., Tonthat, N.K., Lee, J., Rodriguez-Castañeda, F.A., Chinnam, N.  
2 babu, Kallioma-Sanford, A.K., Ng, I.W., Barge, M.T., Shaw, P.L.R. and  
3 Barillà, D. (2015) Structures of archaeal DNA segregation machinery reveal  
4 bacterial and eukaryotic linkages. *Science*, **349**, 1120–1124.
- 5 39. De Silva, R.S., Kovacikova, G., Lin, W., Taylor, R.K., Skorupski, K. and Kull, F.J.  
6 (2005) Crystal structure of the virulence gene activator AphA from *Vibrio*  
7 *cholerae* reveals it is a novel member of the winged helix transcription factor  
8 superfamily. *J Biol Chem*, **280**, 13779–13783.
- 9 40. Lee, C., Kim, M.I. and Hong, M. (2017) Structural and functional analysis of BF2549,  
10 a PadR-like transcription factor from *Bacteroides fragilis*. *Biochem Biophys Res*  
11 *Commun*, **483**, 264–270.
- 12 41. Brennan, R.G. and Matthews, B.W. (1989) The helix-turn-helix DNA binding motif.  
13 *J Biol Chem*, **264**, 1903–1906.
- 14 42. Chavali, G.B., Ekblad, C.M.S., Basu, B.P., Brissett, N.C., Veprintsev, D., Hughes-  
15 Davies, L., Kouzarides, T., Itzhaki, L.S. and Doherty, A.J. (2005) Crystal structure  
16 of the ENT domain of human EMSY. *J Mol Biol*, **350**, 964–973.
- 17 43. Kutsuna, S., Kondo, T., Ikegami, H., Uzumaki, T., Katayama, M. and Ishiura, M.  
18 (2007) The circadian clock-related gene *pex* regulates a negative cis element in  
19 the *kaiA* promoter region. *J Bacteriol*, **189**, 7690–7696.
- 20 44. van der Berg, J.P., Madoori, P.K., Komarudin, A.G., Thunnissen, A.-M. and  
21 Driessen, A.J.M. (2015) Binding of the Lactococcal Drug Dependent  
22 Transcriptional Regulator LmrR to Its Ligands and Responsive Promoter  
23 Regions. *PLoS One*, **10**, e0135467.
- 24 45. Kaval, K.G., Hahn, B., Tusamda, N., Albrecht, D. and Halbedel, S. (2015) The PadR-  
25 like transcriptional regulator LftR ensures efficient invasion of *Listeria*  
26 monocytogenes into human host cells. *Front Microbiol*, **6**, 772.
- 27 46. Hancock, S.P., Cascio, D. and Johnson, R.C. (2019) Cooperative DNA binding by  
28 proteins through DNA shape complementarity. *Nucleic Acids Res*, **47**, 8874–  
29 8887.
- 30 47. Møller-Jensen, J., Ringgaard, S., Mercogliano, C.P., Gerdes, K. and Löwe, J. (2007)  
31 Structural analysis of the ParR/parC plasmid partition complex. *EMBO J*, **26**,  
32 4413–4422.
- 33 48. Schumacher, M.A., Glover, T.C., Brzoska, A.J., Jensen, S.O., Dunham, T.D.,  
34 Skurray, R.A. and Firth, N. (2007) Segrosome structure revealed by a complex of  
35 ParR with centromere DNA. *Nature*, **450**, 1268–1271.
- 36 49. Larsen, R.A., Cusumano, C., Fujioka, A., Lim-Fong, G., Patterson, P. and Pogliano, J.  
37 (2007) Treadmilling of a prokaryotic tubulin-like protein, TubZ, required for  
38 plasmid stability in *Bacillus thuringiensis*. *Genes Dev*, **21**, 1340–1352.

- 1 50. Aylett,C.H.S. and Löwe,J. (2012) Superstructure of the centromeric complex of  
2 TubZRC plasmid partitioning systems. *Proc Natl Acad Sci U S A*, **109**, 16522–  
3 16527.
- 4 51. Martín-García,B., Martín-González,A., Carrasco,C., Hernández-Arriaga,A.M.,  
5 Ruíz-Quero,R., Díaz-Orejas,R., Aicart-Ramos,C., Moreno-Herrero,F. and  
6 Oliva,M.A. (2018) The TubR-centromere complex adopts a double-ring  
7 segrosome structure in Type III partition systems. *Nucleic Acids Res*, **46**, 5704–  
8 5716.
- 9 52. Ni,L., Xu,W., Kumaraswami,M. and Schumacher,M.A. (2010) Plasmid protein  
10 TubR uses a distinct mode of HTH-DNA binding and recruits the prokaryotic  
11 tubulin homolog TubZ to effect DNA partition. *Proc Natl Acad Sci U S A*, **107**,  
12 11763–11768.
- 13 53. Williams,D.R., Macartney,D.P. and Thomas,C.M. (1998) The partitioning activity  
14 of the RK2 central control region requires only incC, korB and KorB-binding  
15 site O(B)3 but other KorB-binding sites form destabilizing complexes in the  
16 absence of O(B)3. *Microbiology (Reading)*, **144 ( Pt 12)**, 3369–3378.
- 17 54. Rice,L.B. (2008) Federal funding for the study of antimicrobial resistance in  
18 nosocomial pathogens: no ESKAPE. *J Infect Dis*, **197**, 1079–1081.
- 19 55. Revilla,C., Garcillán-Barcia,M.P., Fernández-López,R., Thomson,N.R., Sanders,M.,  
20 Cheung,M., Thomas,C.M. and de la Cruz,F. (2008) Different pathways to  
21 acquiring resistance genes illustrated by the recent evolution of IncW plasmids.  
22 *Antimicrob Agents Chemother*, **52**, 1472–1480.
- 23 56. Cabezón,E., de la Cruz,F. and Arechaga,I. (2017) Conjugation Inhibitors and Their  
24 Potential Use to Prevent Dissemination of Antibiotic Resistance Genes in  
25 Bacteria. *Front Microbiol*, **8**, 2329.
- 26 57. Getino,M. and de la Cruz,F. (2018) Natural and Artificial Strategies To Control the  
27 Conjugative Transmission of Plasmids. *Microbiol Spectr*, **6**.
- 28 58. Lopatkin,A.J., Meredith,H.R., Srimani,J.K., Pfeiffer,C., Durrett,R. and You,L.  
29 (2017) Persistence and reversal of plasmid-mediated antibiotic resistance. *Nat*  
30 *Commun*, **8**, 1689.
- 31 59. Carattoli,A. (2013) Plasmids and the spread of resistance. *Int J Med Microbiol*, **303**,  
32 298–304.
- 33 60. Robert,X. and Gouet,P. (2014) Deciphering key features in protein structures with  
34 the new ENDscript server. *Nucleic Acids Res*, **42**, W320-324.

35

## 36 **Figure legends**

37

1 **Figure 1. Sequence and positions of the R388 *stbDR* sequences.**

2 *stbDR* are represented by gray arrows and consensus ones are colored in red. Genes of  
3 which promoters are regulated by StbA and position of *stbS* and the *nic* site of the *oriT*  
4 region are indicated. The schematic representation of the *stbDR* sequences and  
5 intergenic regions is drawn to scale. DNA sequences of each *stbDR* and the consensus  
6 (in red) are shown at the right of the schemas.

7

8 **Figure 2. Multiple sequence alignment of StbA protein sequences.**

9 The amino acids sequence of StbA from plasmid R388 was used as a query in a BLASTP  
10 search among all complete prokaryotic genome sequences available (December 2020).  
11 The multiple sequence alignment is adorned by secondary structures elements observed  
12 in StbA<sub>1-75</sub> crystal structure. The figure has been prepared using the Esript 3.0 web  
13 server (60). **A:** N-terminal domain, **B:** C-terminal domain.

14

15 **Figure 3. Limited proteolysis of StbA.**

16 Purified StbA protein was incubated with different concentrations of trypsin. Samples  
17 were taken at different time points (from 5 to 30 minutes) and analyzed by SDS-PAGE  
18 on a 10% gel. Molecular weight (in kDa) of the size markers (MW), full-length StbA<sub>His6</sub>  
19 and the proteolytic fragment analyzed by mass spectroscopy (P) are reported on the  
20 sides of the gel. Lanes 1-3: proteolysis of purified StbA with trypsin ratio enzyme:protein  
21 of 1:1 (w/w). Lanes 4-6: proteolysis of purified StbA with trypsin ratio enzyme:protein of  
22 1:3 (w/w).

23

24 **Figure 4. Crystal structure of StbA N-terminal domain.**

1 **A.** Ribbon diagram of the monomeric tri-helical HTH structure of StbA<sub>1-75</sub> showing the  
2 HTH fold formed by the three helices in the molecule. Secondary structure elements and  
3 conserved residues forming the hydrophobic core of the HTH motif are labelled.

4 **B.** Structural superposition of StbA<sub>1-75</sub> (crimson) with the PadR-like transcriptional  
5 regulator Rv3488 of *Mycobacterium tuberculosis* H37Rv (blue, PDB ID: 5ZHC).

6 **C.** Electrostatic surface potentials of StbA<sub>1-75</sub> showing a conserved positive surface  
7 patch. Positive, negative, and neutral electrostatic potentials are represented by blue,  
8 red, and white, respectively. Most conserved basic residues are shown.

9

#### 10 **Figure 5. DNA-binding activities of StbA and StbA<sub>1-75</sub> by EMSA.**

11 Fluorescently labeled DNA fragments carrying a variable number of *stbDR* were  
12 incubated with increasing concentrations of purified His-tagged StbA (**A, B**) or StbA<sub>1-75</sub>  
13 (**C**). EMSA were performed on 5% polyacrylamide gels with 0 (lanes 1), 500 nM (lanes 2),  
14 1 μM (lanes 3), 2 μM (lanes 4), 4 μM (lanes 5), 8 μM (lanes 6), and 16 μM (lanes 7) StbA  
15 (**A and B**) or StbA<sub>1-75</sub> (**C**). DNA substrates are schematized at the top of the gels. Arrows  
16 represent *stbDR* sequences with the same color legend as in Figure 1. *stb1*, *stb2*, *stb2b*,  
17 *stb3* and *stb5b* are 5'-Cy3-labeled, and *stb5* and *stb5a* are 5'-Cy5-labeled. *stb5a* and  
18 *stb5b* contain *stbDR* 1 to 5 and *stbDR* 6 to 10, respectively. All substrates are 80 bp long  
19 except *stb5b* (60 bp). Dotted lines between lanes indicate that they were not side-by-  
20 side in the original gel. Free DNA and protein-DNA complexes are indicated by black and  
21 white wedges, respectively, and larger complexes termed high molecular weight  
22 complexes (HMW) are shown by vertical bars.

23

1 **Figure 6. The DNA-binding domain of StbA shows partial activity on the stability and**  
2 **in the control of conjugation of plasmid R388.**

3 The stability (**A**) and the conjugation frequencies (**B**) of different derivatives of plasmid  
4 R388 are shown. Plasmids are indicated on the X-axis.

5 **A.** Stability was measured as the rate of loss per cell per generation from strain LN2666  
6 (Materials and Methods).

7 **B.** Conjugation frequencies as the number of transconjugants per donor (a Log scale is  
8 used for the Y-axis). Error bars show standard deviations calculated from at least four  
9 independent assays.

10

11 **Figure 7. The DNA-binding domain of StbA shows partial activity on subcellular**  
12 **localization of plasmid R388.**

13 **A.** Live cell imaging of *E. coli* strain LN2666 containing R388 derivatives harboring *parS*  
14 (R388, R388 $\Delta$ *stbA*, R388*stbA*<sub>1-75</sub> and R388*stbA*<sub>1-75</sub> $\Delta$ *stbB*) and expressing GFP- D30ParB  
15 from plasmid pALA2705. Scalebar = 3  $\mu$ m. From left to right, panels show fluorescence  
16 pictures of (i) ParB-GFP-tagged plasmids (green) merged with fluorescence pictures of  
17 HU-mcherry (red) and the phase contrast pictures, (ii) ParB-GFP alone, (iii) HU-mcherry  
18 alone, (iv) ParB-GFP-tagged plasmids merged with HU-mcherry, and (v) phase contrast  
19 alone.

20 **B.** Distribution of GFP foci within the different fractions of cell length. The distance of  
21 foci to the closest cell pole was measured and sampled into five equal sections of cell  
22 length from the pole to mid-cell (R388 n= 5016, R388 $\Delta$ *stbA* n= 2686, R388*stbA*<sub>1-75</sub> n=  
23 2405, R388*stbA*<sub>1-75</sub> $\Delta$ *stbB* n= 2383).

24

1 **Table 1: Data collection and model refinement statistics.**

2

3 **Table 2: Transcriptional activity of *stbDR*-carryng promoters in the presence of StbA**  
4 **or StbA<sub>1-75</sub>.**

5 Expression rates are expressed as the ratio between the expression levels (GFP/OD)  
6 measured in the presence and the absence of StbA or StbA<sub>1-75</sub>. StbA or StbA<sub>1-75</sub> were  
7 produced from a co-residing plasmid pBAD33 (pBAD33::*StbA*<sub>1-75</sub> or pBAD33::*StbA*<sub>1-75</sub>,  
8 respectively) and  $2.5 \cdot 10^{-7}$  of inducer (arabinose). Reference expression levels were  
9 measured in the presence of the empty vector (pBAD33). A control experiment with a  
10 promoter carrying no *stbDR* (pKorA) is shown. Extreme values are shown between  
11 brackets.

12

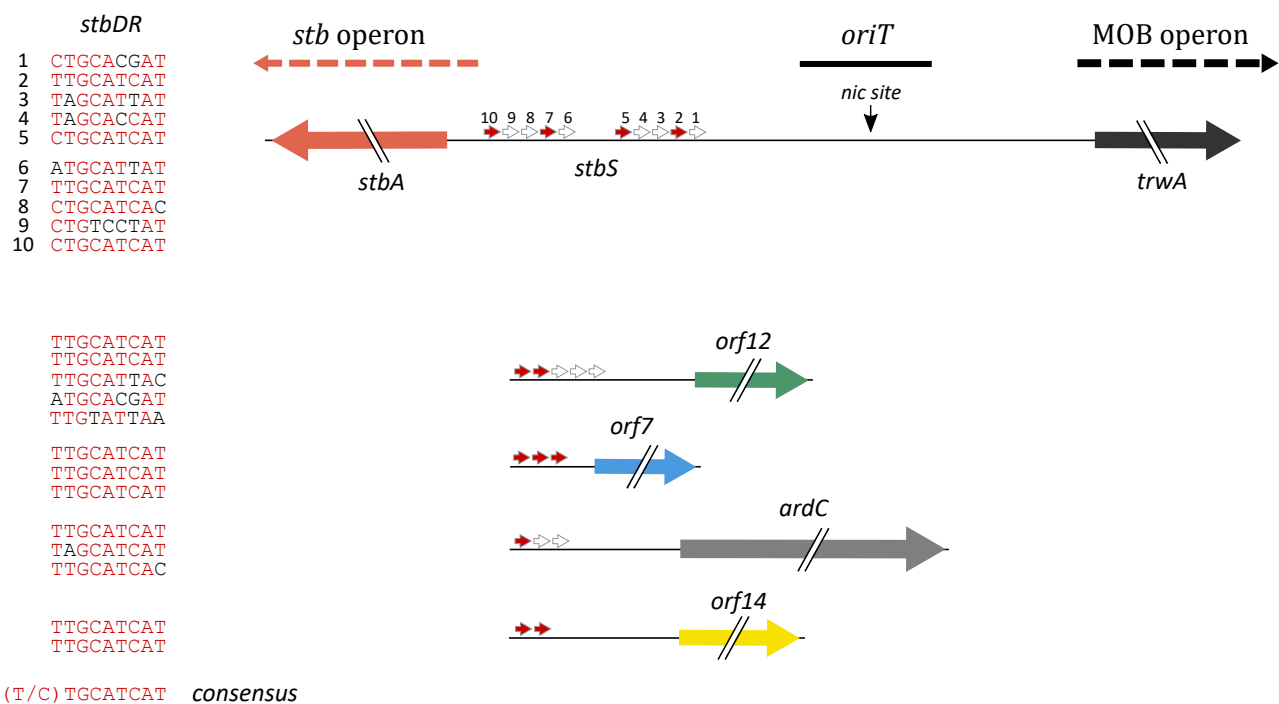

Figure 1



A

```
R388/1-141          α1          α2          α3
R388/1-141          1 10 20 30 40 50 60 70
R388/1-141          .VNETDALKDRITENIRPR...MTLAKLRRELMPEIDRQVRAGVQHDDIVETLNA...NGFDVNLNTRFRSYLYRYRKKAR..ASE
pXCC_55/1-148      .MPKSDLTQALTAIEP...KTAAKVRREVMFVIEQRIAA...VRIADILKTKLD...SGIDLTEATLTKSYLYRYRKKHQAOKT..
pXcmN/1-148       .MPKSDLTQALTAIEP...KTAAKVRREVMFVIEQRIAA...VRIADILKTKLD...SGIDLTEATLTKSYLYRYRKKHQAOKT..
byi_3p/1-156      .MPQRNLIQALTAIEP...KTAAKVRREVMFVIEQRIAA...VRIADILKTKLD...SGIDLTEATLTKSYLYRYRKKHQAOKT..
pO70-2/1-139     .MKPTDAQQAIEQTAP...TTKAAQLRREVMPEIEAKLAA...VRLGTHHQLND...AGFELTFOTLTKTYLYRYRKKHQAOKT..
pO70_1/1-152     .MKPTDAQQAIEQTAP...TTKAAQLRREVMPEIEAKLAA...VRLGTHHQLND...AGFELTFOTLTKTYLYRYRKKHQAOKT..
pG/1-151         .MTKPDAAKQAVRQTEP...TTKAAQLRREVMPEIEAKLAA...VRLGTHHQLND...AGFELTFOTLTKTYLYRYRKKHQAOKT..
pRSC35/1-144     .MSEPDLKAQIEAIKL...TTKAAKLRRELMPEIEAKLAE...VRAAEIVETLRK...GGLDLMTGTFFRNYLHQVYRKHQGA..
pPF72-1/1-151   .MSETLTKARIEALKH...STKAAARLRQLMPSIEAKLAE...VRAAEIVETLRK...GGLDLMTGTFFRNYLHQVYRKHQGA..
Collimonas/1-138 .MEKSTVKQAISEMQP...TTKAAKLRRELMPEIEAKLAE...VQFKDVLLEALKI...GGLDFDLATFKTYVYRFRKKE..NVKT..
pPHE101/1-151   .MNDKDLTNALMAVEP...ETKAAKIRQVMPLEIEQQLSA...VRRQVILDDVLKQ...QGTIELSMETLTKSYLYRYRKKHQAOKT..
pNAH7/1-151     .MTDKDLTNALMAVEP...ETKAAKIRQVMPLEIEQQLSA...VRRQVILDDVLKQ...QGTIELSMETLTKSYLYRYRKKHQAOKT..
pDTG1/1-151     .MGDKDLTNALMAVEP...ETKAAKIRQVMPLEIEQQLSA...VRRQVILDDVLKQ...QGTIELSMETLTKSYLYRYRKKHQAOKT..
pW0/1-151       .MAGKDLTALMAVEP...VTKAAKIRQVMPVIEKQLKAGVRRQAILDDVLKQ...QGTIELSMETLTKSYLYRYRKKHQAOKT..
unnamed2/1-149  .MAKLDLATALQAVEP...ETKAAKIRQVMPVIEKQLKAGVRRQAILDDVLKQ...QGTIELSMETLTKSYLYRYRKKHQAOKT..
pSsa22180b/1-151 .MAKLDLATALQAVEP...ETKAAKIRQVMPVIEKQLKAGVRRQAILDDVLKQ...QGTIELSMETLTKSYLYRYRKKHQAOKT..
plasmII/1-147   .MDVVDKLLKQITDLTG...GTTAAKLRREVMPEIEEKLDQ...VRRHEEIVAAALAA...GGLDVLTEFTFRKTYLYRYRKKHQAOKT..
pLc/1-148       .MDVVDKLLKQITDLTG...GTTAAKLRREVMPEIEEKLDQ...VRRHEEIVAAALAA...GGLDVLTEFTFRKTYLYRYRKKHQAOKT..
pSG1/1-126      .MKPK...SIRAALQMLQVEEEMSLG...VSRREDVFKVVSERF...NIANVNVRSFDTALYRRA...QIRKNGMHN
R46/1-139       .MKNKPADLKP...NLSAAVRLRLN...EIEENWLDRL...LTHREIAEILDSEYSP...VTA.KGLEMALYRTRONRKN...
pEC_L46/1-128   .MKNKPADLKP...NLSAAVRLRLN...EIEENWLDRL...LTHREIAEILDSEYSP...VTA.KGLEMALYRTRONRKN...
pHECT-110/1-111 .MKNKPADLKP...NLSAAVRLRLN...EIEENWLDRL...LTHREIAEILDSEYSP...VTA.KGLEMALYRTRONRKN...
pDB85-27/1-129 .MKTTSADVLRLELA.KGDKRSSETARLRDVIDVEAALAA...VRSRAVLEALHG...QGTMTLKSFSALYRTRONRKN...
p1b/1-129       .MKTTSADVLRLELA.KGDKRSSETARLRDVIDVEAALAA...VRSRAVLEALHG...QGTMTLKSFSALYRTRONRKN...
pXap41/1-141    .MDRKAIAERLRALAS.DDKNRSKTRARLRDVIDVEAALAA...VRSRAVLEALHG...QGTMTLKSFSALYRTRONRKN...
pXF6c/1-129     .MKNKPADLKP...NLSAAVRLRLN...EIEENWLDRL...LTHREIAEILDSEYSP...VTA.KGLEMALYRTRONRKN...
pMBUI6/1-149   .MKNKPADLKP...NLSAAVRLRLN...EIEENWLDRL...LTHREIAEILDSEYSP...VTA.KGLEMALYRTRONRKN...
small1/1-128    .MKNKPADLKP...NLSAAVRLRLN...EIEENWLDRL...LTHREIAEILDSEYSP...VTA.KGLEMALYRTRONRKN...
pSv48C/1-135   .MKNKPADLKP...NLSAAVRLRLN...EIEENWLDRL...LTHREIAEILDSEYSP...VTA.KGLEMALYRTRONRKN...
p14057-KPC/1-130 .MKNKPADLKP...NLSAAVRLRLN...EIEENWLDRL...LTHREIAEILDSEYSP...VTA.KGLEMALYRTRONRKN...
StbA_pMBUI/1-157 .MKNKPADLKP...NLSAAVRLRLN...EIEENWLDRL...LTHREIAEILDSEYSP...VTA.KGLEMALYRTRONRKN...
pGP59-34/1-122 .MKNKPADLKP...NLSAAVRLRLN...EIEENWLDRL...LTHREIAEILDSEYSP...VTA.KGLEMALYRTRONRKN...
unnamed3/1-124 .MKNKPADLKP...NLSAAVRLRLN...EIEENWLDRL...LTHREIAEILDSEYSP...VTA.KGLEMALYRTRONRKN...
pMRSN34663/1-159 .MKNKPADLKP...NLSAAVRLRLN...EIEENWLDRL...LTHREIAEILDSEYSP...VTA.KGLEMALYRTRONRKN...
```

B

```
R388/1-141          80 90 100 110 120 130 140
R388/1-141          .GQEPQAQATPK...ADGNPQVRADAPT...EDLTDAAAGDAPT...STSFDDALDR...RKRDRVGESEYMLTRRPF...IIGKSSNT...
pXCC_55/1-148     .GQEQP...ASQTVGMP...APPQGESESVSHETD...SAETPPSRGPI...SMQELDR...VMKP...DPEEQAKDIARYER...LAKEKWRKHK...
pXcmN/1-148      .VGRQAQVPAPRADNAP...ASTQSGES...VSEYD...SAETPPSRGPI...SMQELDR...VMKP...DPEEQAKDIARYER...LAKEKWRKHK...
byi_3p/1-156     .AGRPAQPGAAQSDATQ...PVDVSPPHHPASSALN...ETDSSASPSRGP...ISMQELDR...LMKP...DPAEQAEKDIARYER...LAKEKWRKHK...
pO70-2/1-139    .AERLAVPGD...PRSEASVSH...ATDAG...PPRPREPLSVQ...EIDRL...MKP...DPAEQAEKDIARYER...LAKEKWRKHK...
pO70_1/1-152    .AGRQAEPVDSRTAAAP...SPRPEAGVSNVPPAT...DSG...PPP...PREPLSVQ...EIDRL...MKP...DPAEQAEKDIARYER...LAKEKWRKHK...
pG/1-151        .VRQQTESVGSRSAG...TPTP...ASSQDES...VSD...EY...SSEPT...PRGPI...SMQELDR...LMKP...DPAEQAEKDIARYER...LAKEKWRKHK...
pRSC35/1-144    .VERQATVPVGRP...PES...VESVSYETD...STA...ESG...G...P...V...SMQELDR...LMKP...DPAEQAEKDIARYER...LAKEKWRKHK...
pPF72-1/1-151   .TERPEVPGG...SQTAGV...PASRRPEACV...S...Q...E...S...A...P...P...T...E...G...G...P...P...A...P...R...E...P...P...S...V...Q...E...L...D...R...L...M...K...P...
Collimonas/1-138 .VTVSRKPP...SVGT...A...E...T...E...T...G...Q...E...S...A...A...E...N...S...P...G...E...P...V...S...M...Q...H...L...S...N...M...K...P...
pPHE101/1-151   .KQAA...T...S...S...Q...V...S...V...Q...V...P...V...I...E...R...E...A...P...E...K...E...G...V...S...Y...D...D...A...E...S...P...V...S...Q...T...A...P...L...G...P...
pNAH7/1-151     .KQTK...T...S...P...V...S...M...Q...V...P...V...I...E...R...E...A...P...E...K...E...G...V...S...Y...D...D...A...E...S...P...V...S...Q...T...A...P...L...G...P...
pDTG1/1-151     .QSNQ...T...T...N...P...A...P...S...M...Q...V...P...V...I...E...R...E...A...P...E...K...E...G...V...S...Y...D...D...A...E...S...P...V...S...Q...T...A...P...L...G...P...
pW0/1-151       .VASP...A...P...A...L...T...T...K...E...P...R...Q...N...E...P...P...I...E...G...G...V...S...Y...D...D...P...H...D...S...H...D...E...R...S...H...V...G...P...
unnamed2/1-149  .VEAP...A...N...V...P...S...S...A...A...V...P...E...A...T...A...E...K...I...E...V...S...Y...D...T...K...T...E...S...Q...D...L...P...A...P...M...A...P...
pSsa22180b/1-151 .NGAS...V...G...S...E...L...D...K...Q...E...P...S...A...P...R...V...S...G...N...V...S...Y...D...D...E...A...E...G...S...D...A...R...P...T...G...P...V...V...G...S...L...S...K...L...M...N...P...
plasmII/1-147   .T...P...P...K...T...A...R...T...T...R...A...D...G...N...P...Q...V...R...A...D...A...P...T...E...D...L...T...D...A...A...G...D...A...P...T...S...T...S...F...D...D...A...L...D...R...
pLc/1-148       .T...P...P...K...A...V...R...A...T...A...D...G...N...P...Q...V...R...A...D...A...P...T...E...D...L...T...D...A...A...G...D...A...P...T...S...T...S...F...D...D...A...L...D...R...
pSG1/1-126      .L...E...K...S...T...N...L...S...Y...R...K...D...R...V...E...I...S...K...D...P...L...L...S...K...K...R...Q...T...E...E...K...E...E...R...S...N...I...P...N...
R46/1-139       .T...H...G...R...M...P...N...N...E...D...S...V...L...H...N...T...O...N...G...S...E...K...A...E...S...V...L...H...N...T...O...T...P...E...P...
pEC_L46/1-128   .V...L...Y...N...O...G...E...T...G...A...I...A...P...G...S...A...R...F...S...H...D...E...K...G...G...E...V...A...P...A...V...G...
pDB85-27/1-129 .O...G...A...A...A...P...I...A...P...T...P...L...R...H...D...E...Q...G...E...V...A...S...A...S...K...A...G...D...F...E...I...P...V...P...K...R...F...I...H...N...P...D...D...L...L...
p1b/1-129       .O...G...A...A...A...P...I...A...P...T...P...L...R...H...D...E...Q...G...E...V...A...S...A...S...K...A...G...D...F...E...I...P...V...P...K...R...F...I...H...N...P...D...D...L...L...
pXap41/1-141    .O...G...T...A...G...T...P...A...A...P...V...P...A...P...L...R...H...D...E...K...P...P...A...S...P...P...A...E...N...A...R...E...G...D...K...P...K...A...R...I...T...
pXF6c/1-129     .R...K...L...Q...I...S...V...I...P...S...Q...Q...E...K...P...H...E...T...L...T...P...V...I...S...H...P...D...L...D...K...I...G...S...K...P...D...L...A...A...K...L...A...K...R...R...K...
pMBUI6/1-149   .K...P...A...Q...P...A...P...S...P...A...K...P...A...Q...I...P...A...K...A...S...T...A...K...A...Q...P...V...E...E...V...E...P...P...I...A...S...H...N...P...K...D...I...Q...I...M...Q...I...A...P...D...L...A...L...A...K...L...G...R...R...N...K...
small1/1-128    .K...L...E...N...P...Q...P...Q...K...T...K...E...P...G...R...V...L...Q...P...S...A...S...K...P...H...A...F...A...G...L...S...G...N...G...R...D...K...D...A...V...H...H...S...V...P...D...H...D...R...I...Y...D...R...
pSv48C/1-135   .K...I...S...E...A...S...T...G...I...A...G...S...S...E...S...H...S...A...S...Q...L...T...S...Q...P...E...G...K...P...H...P...F...A...G...L...S...G...N...G...R...D...S...N...A...V...H...H...S...V...P...D...K...D...R...I...Y...G...R...K...
p14057-KPC/1-130 .S...K...A...A...T...K...P...L...E...Q...P...Q...N...G...S...A...P...V...Q...E...P...K...P...D...L...Q...A...E...V...K...D...E...A...E...S...L...D...E...M...L...K...N...E...Q...S...R...E...F...T...N...Q...F...M...Q...R...P...I...R...K...R...H...D...E...S...S...S...P...V...R...
StbA_pMBUI/1-157 .K...T...V...I...R...K...P...A...V...Q...P...T...A...E...K...Q...A...K...P...Q...D...K...S...K...E...A...D...I...D...L...K...A...L...G...K...L...G...S...K...P...K...R...N...R...L...
pGP59-34/1-122 .P...T...E...K...K...D...I...P...L...Y...T...A...T...R...T...S...E...L...K...S...M...A...H...T...T...S...Q...E...S...D...A...S...L...R...Q...T...K...L...A...L...K...Y...R...R...T...G...
unnamed3/1-124 .S...H...L...L...S...N...K...E...K...T...Y...Q...K...A...I...T...I...E...D...K...N...R...K...T...Q...D...N...I...L...N...A...L...P...V...C...F...N...A...K...I...A...Q...Q...A...I...D...N...N...V...S...I...E...T...
pMRSN34663/1-159 .S...H...L...L...S...N...K...E...K...T...Y...Q...K...A...I...T...I...E...D...K...N...R...K...T...Q...D...N...I...L...N...A...L...P...V...C...F...N...A...K...I...A...Q...Q...A...I...D...N...N...V...S...I...E...T...
```

Figure 2

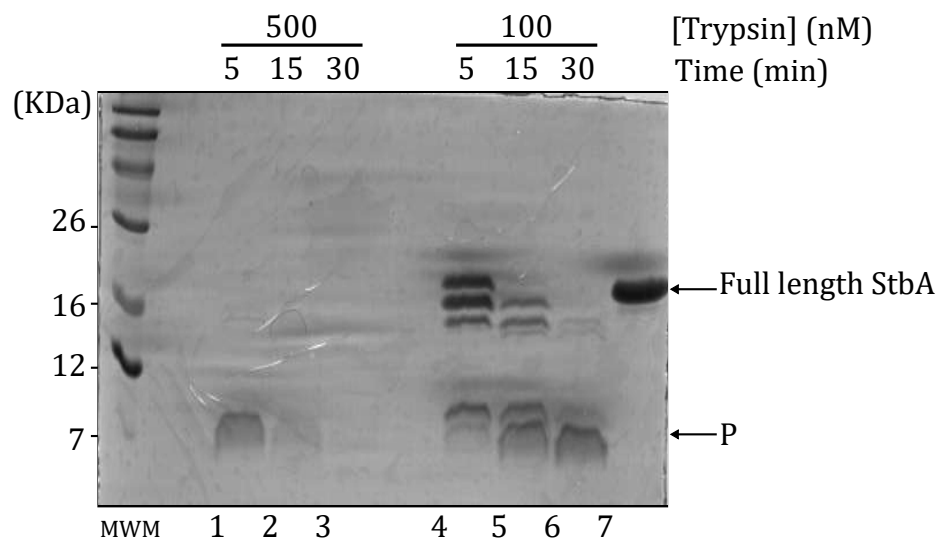

Figure 3

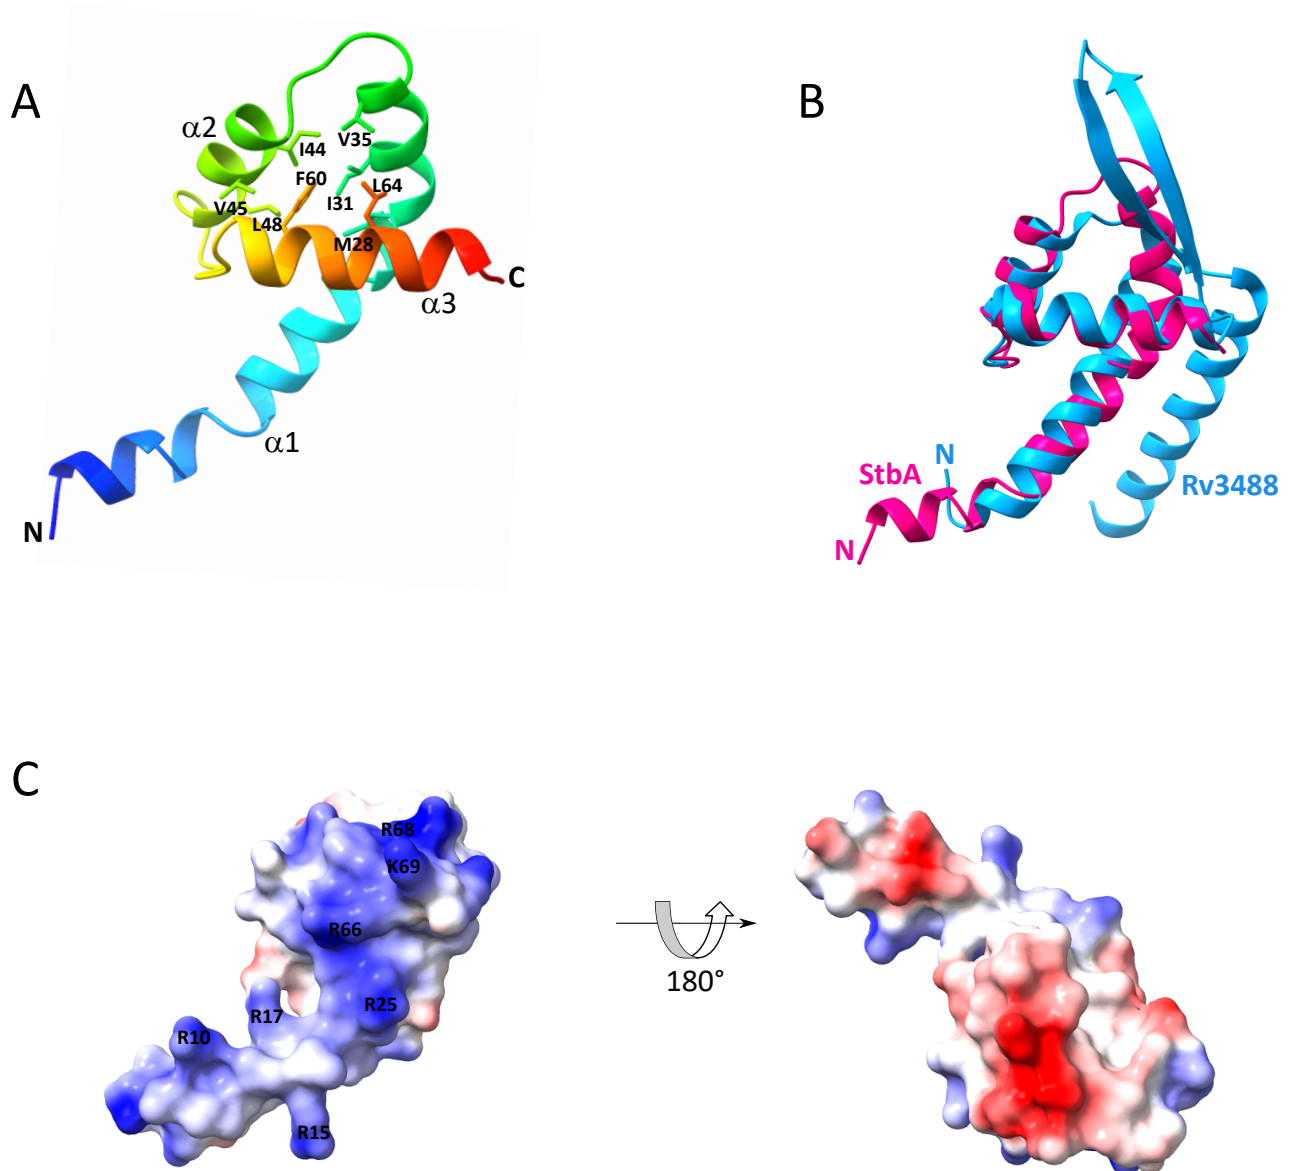

Figure 4

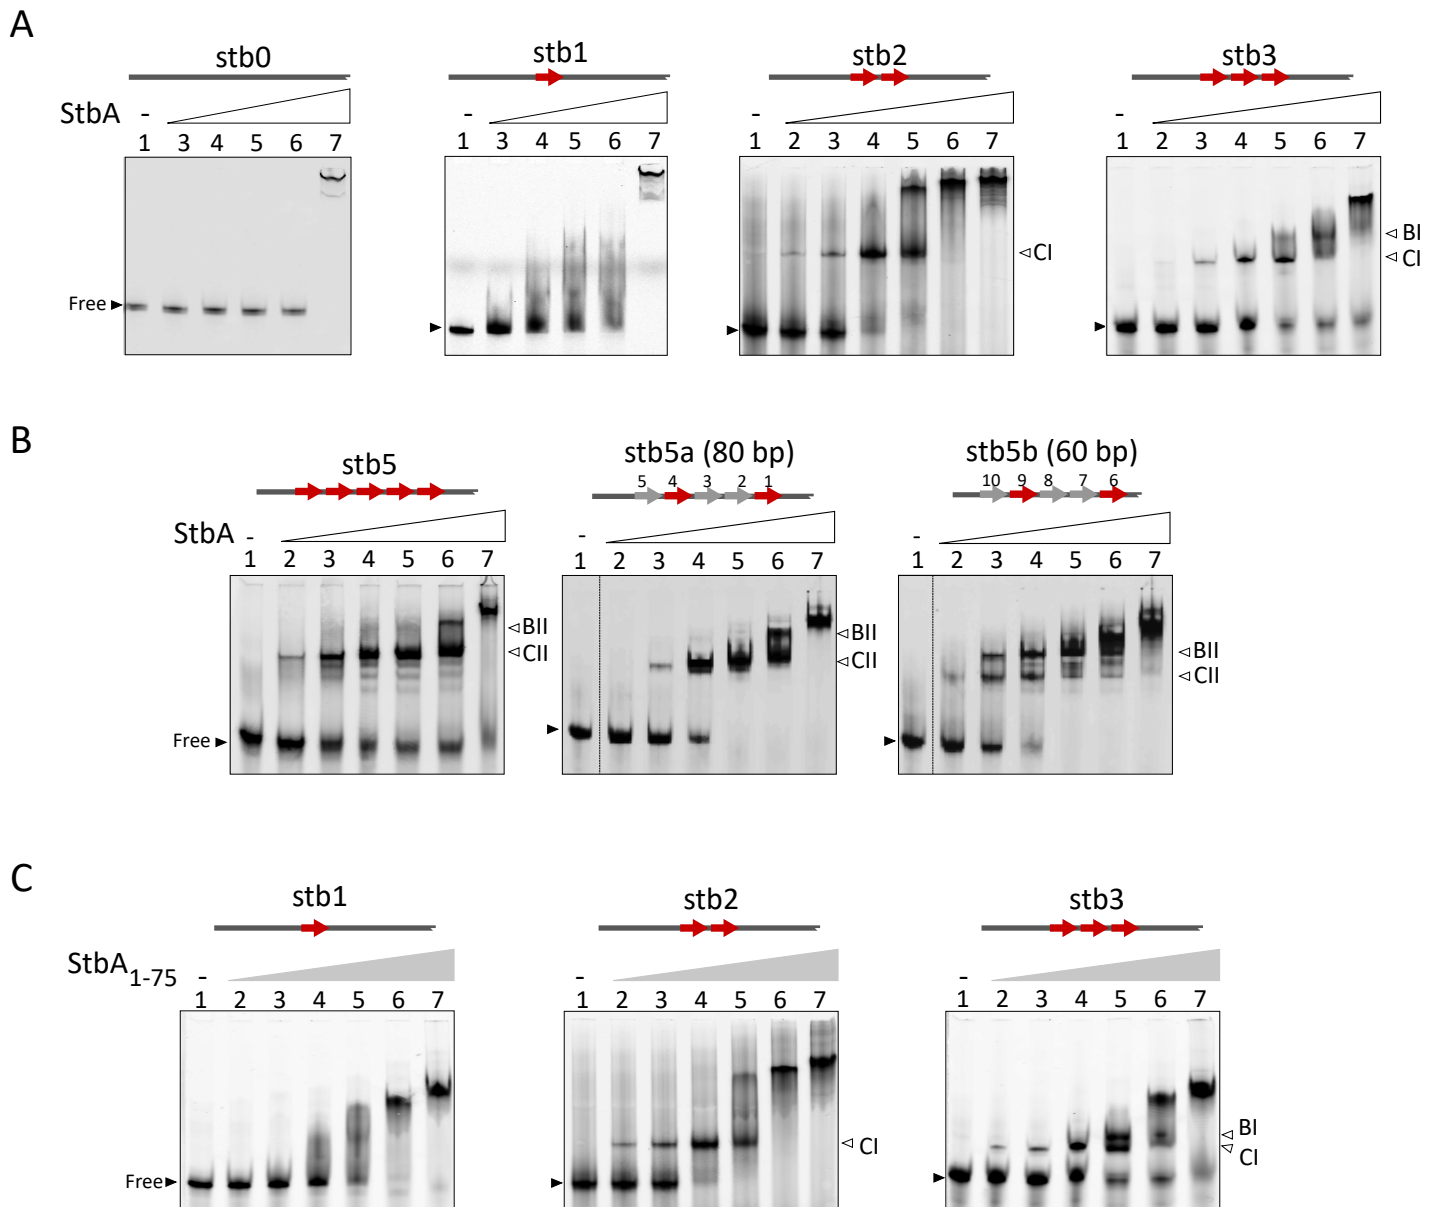

Figure 5

A

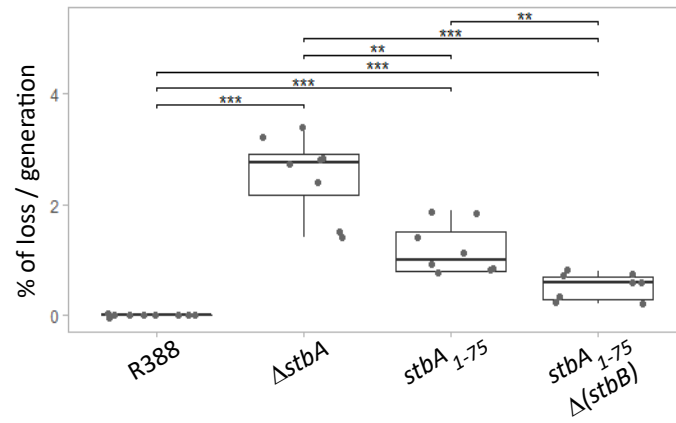

B

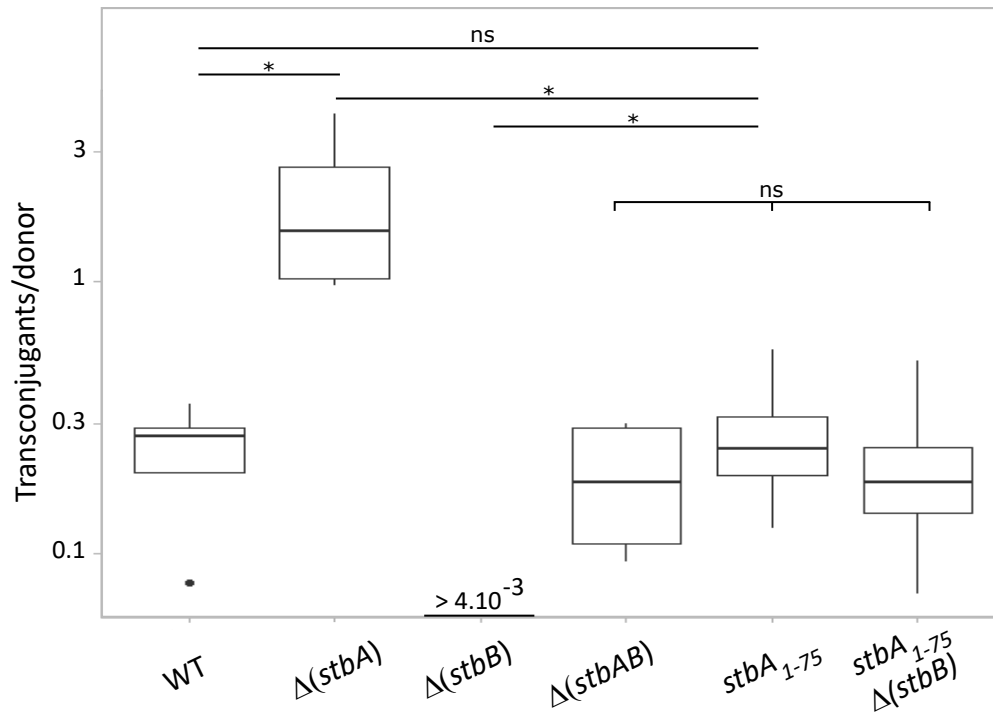

Figure 6

A

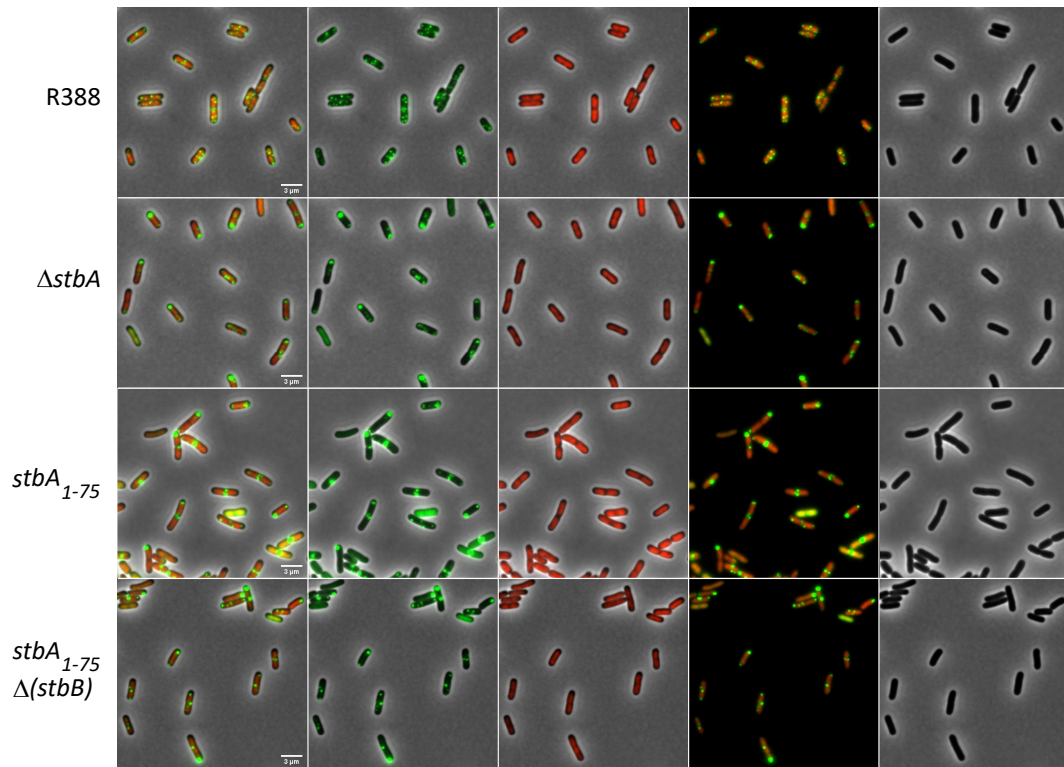

B

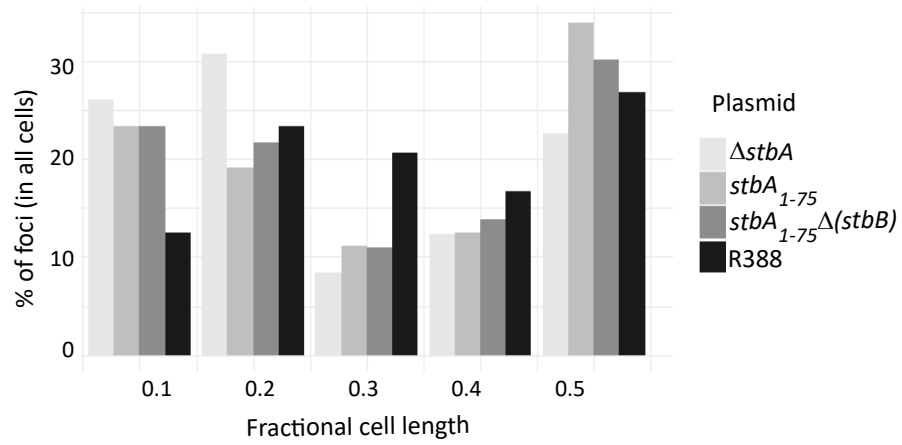

Figure 7

**Table 1 : data collection and model refinement statistics**

---

**StbA-SeMet**

---

|                                        |                    |                                    |                 |
|----------------------------------------|--------------------|------------------------------------|-----------------|
| <b>Wavelength</b>                      | 0.9793             | <b>Reflections used for R-free</b> | 312 (30)        |
| <b>Resolution range</b>                | 34.4-1.9 (2.0-1.9) | <b>R-work</b>                      | 0.2003 (0.2935) |
| <b>Space group</b>                     | P 3 <sub>1</sub>   | <b>R-free</b>                      | 0.2222 (0.2688) |
| <b>Unit cell</b>                       | a=b=45.62 c=34.39  | <b>CC(work)</b>                    | 0.954 (0.764)   |
| $\alpha=\beta=90$ $\gamma=120$         |                    | <b>CC(free)</b>                    | 0.928 (0.722)   |
| <b>Total reflections</b>               | 35568 (4758)       | <b>Number of non-H atoms</b>       | 608             |
| <b>Unique reflections</b>              | 6294 (897)         | <b>Protein residues</b>            | 596             |
| <b>Multiplicity</b>                    | 5.7 (5.3)          | <b>RMS(bonds)</b>                  | 0.008           |
| <b>Completeness (%)</b>                | 99.3 (96.8)        | <b>RMS(angles)</b>                 | 0.92            |
| <b>Mean I/sigma(I)</b>                 | 28.5 (3.8)         | <b>Ramachandran favored (%)</b>    | 98.57           |
| <b>Wilson B-factor (Å<sup>2</sup>)</b> | 32.05              | <b>Ramachandran allowed (%)</b>    | 1.43            |
| <b>R-merge</b>                         | 0.032 (0.386)      | <b>Ramachandran outliers (%)</b>   | 0.0             |
| <b>CC1/2</b>                           | 0.999 (0.864)      | <b>Rotamer outliers (%)</b>        | 3.2             |
| <b>CC*</b>                             | 1.0 (0.907)        | <b>Clashscore</b>                  | 5.01            |
| <b>Reflections used</b>                | 6276 (622)         | <b>Average B-factor</b>            | 34.91           |
| <b>in refinement</b>                   |                    |                                    |                 |

---

Table 2 : Transcriptional activity of *stbDR*-carryng promoters in the presence of StbA or StbA<sub>1-75</sub>

|                      | Expression rate in the presence of StbA | Expression rate in the presence of StbA <sub>1-75</sub> |
|----------------------|-----------------------------------------|---------------------------------------------------------|
| <b><i>PstbA</i></b>  | 2.5 % (2.3, 2.8)                        | 9.8 % (8.2, 12.9)                                       |
| <b><i>Porf12</i></b> | 3,7 % (2.9, 4.8)                        | 14.9 % (11.3, 18.2)                                     |
| <b><i>Porf7</i></b>  | 2.7 % (2.7, 2.8)                        | 15.2 % (14.6, 16.3)                                     |
| <b><i>Porf14</i></b> | 5.5 % (5.0, 6.4)                        | 14.7 % (12.7, 16.8)                                     |
| <b><i>PkorA</i></b>  | 96.3 % (93.8, 98.8)                     | 103.4 % (102.8, 104.5)                                  |



## 1 Supplementary data

### 2 Supplementary materials and methods:

3 **Bacterial-two-hybrid analysis (BACTH).** Dimerization of StbA and StbA<sub>1-75</sub> was analyzed *in*  
4 *vivo* using the bacterial two-hybrid system ((59); (60)) in the *E. coli* BTH101 *cyaA* strain.  
5 N- and C-terminal CyaAT18 or CyaAT25 fusions of *stbA* or *stbA*<sub>1-75</sub> were constructed using  
6 plasmid pKT25, pUT18C and pUT18. *stbA* and *stbA*<sub>1-75</sub> genes were amplified by PCR from  
7 plasmid R388 using primers G158 and G159, and G158 and G254, respectively and cloned  
8 between the *Bam*HI and *Eco*RI restriction sites of pUT18C and pKT25, or using primers  
9 G161 and G162, and G161 and G256, respectively and cloned between the *Bam*HI and  
10 *Hind*III restriction sites of pUT18.

11 Derivative BACTH vectors were co-transformed into *E. coli* BTH101 *cyaA* in all pairwise  
12 combinations. Several colonies of co-transformants were selected and grown in LB  
13 medium supplemented with 100 µg/ml ampicillin, 50 µg/ml kanamycin and 0.5 mM IPTG  
14 overnight at 30°C. Overnight cultures were then spotted on MacConkey plates with  
15 maltose as a carbon source containing 100 µg/ml ampicillin, 50 µg/ml kanamycin and 0.5  
16 mM IPTG and plates were incubated at 30°C during 48 h.

17

### 18 Size exclusion chromatography

19 Analytical gel filtration experiments were performed at 4°C using a Superdex 75 (10/300  
20 GL) (GE Healthcare) with the FPLC system (Amersham Biosciences). Samples (250 µl)  
21 were injected onto the column pre-equilibrated with 20 mM Tris pH 7.5, 200 mM NaCl,  
22 2 mM EDTA and 1 mM DTT and run over with the same buffer at a rate of 0.5ml/min  
23 and monitored by absorbance at 280 nm. For size estimation, the column was calibrated  
24 with ovalbumin (42.7 kDa), ribonuclease A (13.7 kDa) and Aprotinin (6.5 kDa). The K<sub>av</sub>

1 value was calculated for each standard protein (using the equation  $(V_e - V_0)/(V_c - V_0)$ ,  
2 where  $V_e$  is the elution volume for the protein,  $V_0$  the column void volume ( $V_0 = 8$  ml) and  
3  $V_c$  the geometric column volume ( $V_c = 24$  ml)), and plotted against the logarithm of  
4 standard molecular weights.

5

## 6 **Supplementary figures**

7 **Table S1.** Strains and plasmids

8 **Table S2.** Oligonucleotides used in this study

9 **Table S3.** Sequence ID of proteins used in Figure 2

10 **Figure S1.** WebLogo of amino-acid sequences of the turn between  $\alpha_2$  and  $\alpha_3$  of StbA  
11 proteins.

12 The sequence logos of the turn between  $\alpha_1$  and  $\alpha_2$  helices of StbA proteins was  
13 generated using the WebLogo software (61) from amino-acid sequences of StbA proteins  
14 shown in Figure 2. Hydrophobic, acidic, small, basic and polar non-charged residues are  
15 shown in blue, red, purple, green and black, respectively.

16

17 **Figure S2. Gel filtration chromatography analysis of purified StbA and StbA<sub>1-75</sub>.**

18 StbA and StbA<sub>1-75</sub> were analyzed at 60  $\mu$ M. Elution profiles were monitored by absorbance  
19 at 280 nm. The elution positions of molecular weight standards (Ovalbumin (43 kDa),  
20 Ribonuclease A (13.7 kDa) and Aprotinin (6.5 kDa) are indicated. The molecular mass  
21 expected for a monomer is 17 kDa for StbA and 9.9 kDa for StbA<sub>1-75</sub>. StbA and StbA<sub>1-75</sub>  
22 eluted at 16.5 ml and 13.25 ml, respectively. The experimental  $K_{av}$  values suggest a  
23 molecular mass in solution of 31.5 kDa for StbA and 11.5 kDa for StbA<sub>1-75</sub> corresponding  
24 to a dimer and to a monomer, respectively. In both cases, the pick corresponding to high

1 molecular weight species (void fractions) was likely due to protein aggregation during  
2 storage.

3

4 **Figure S3. StbA and StbA<sub>1-75</sub> dimerization *in vivo* in the BACTH system.**

5 Bacterial two-hybrid of StbA and StbA<sub>1-75</sub> tagged at their N-terminus (T25-StbA, T18-StbA  
6 and T25-StbA<sub>1-75</sub>, T18-StbA<sub>1-75</sub>) or C-terminus (StbA-T18 and StbA<sub>1-75</sub>-T18). Double  
7 transformants of *E. coli* BTH101 *cyoA* with compatible plasmids encoding CyaA fragment  
8 T18 or T25 fused to either StbA or StbA<sub>1-75</sub> were analyzed on indicator MacConkey plates  
9 with maltose as a carbon source. Purple spots are indicative of interactions between  
10 interactive proteins. Image representative of 3 independent trials.

11

12 **Figure S4. Crystallographic analysis of StbA multimerization.**

13 **A.** The molecular surface map of StbA<sub>1-75</sub> reveals a patch of hydrophobic residues, of  
14 which several are conserved or with similar side chains, as seen in the sequence  
15 alignment (Figure 2), and which are putatively involved in dimerization. Coloring is from  
16 dark cyan for most hydrophilic through white to dark goldenrod for most hydrophobic.

17 **B.** Ribbon diagram of a trimer of StbA<sub>1-75</sub> as observed in the crystal showing a three-fold  
18 symmetry between StbA<sub>1-75</sub> subunits. The hydrogen bond (dotted blue line) formed by  
19 Asp<sub>5</sub> from monomer 1 (green) and Lys<sub>69</sub> from monomer 3 (purple) and that may stabilize  
20 the trimer is indicated.

21

22 **Figure S5. DNA-binding activities of StbA and StbA<sub>1-75</sub> by electrophoretic mobility shift assay  
23 (EMSA).**

1 EMSA performed on 5% polyacrylamide gels. DNA substrates are schematized at the top  
2 of the figure. Free DNA and high molecular weight complexes are indicated by black  
3 wedges and a vertical bar, respectively.

4 **A.** A Cy3-labeled 80-pb DNA fragment carrying 2 *stbDR* consensus sequences separated  
5 by 43 bp (*stb2'*) was incubated with 0 (lane 1), 1  $\mu$ M (lane 3), 2  $\mu$ M (lane 4), 4  $\mu$ M (lane  
6 5), 8  $\mu$ M (lane 6), and 16  $\mu$ M (lane 7) StbA.

7 **B.** *stb5a* (Cy5-labeled, left panel), *stb5b* (Cy3-labeled, central panel) or both (right panel)  
8 substrates were incubated with 1  $\mu$ M (lanes 3, 7, 11, 15), 4  $\mu$ M (lanes 4, 8, 12, 16), 16  $\mu$ M  
9 (lanes 5, 9, 13, 17) StbA.

10 **C.** *stb5* substrate (Cy5-labeled) was incubated with 1  $\mu$ M (lanes 3, 7, 11, 15), 4  $\mu$ M (lanes  
11 4, 8, 12, 16), 16  $\mu$ M (lanes 5, 9, 13, 17) StbA in the presence of a second Cy3-labeled DNA  
12 fragment carrying 1 (*stb1*), 2 (*stb2* and *stb2'*) or 3 *stbDR* (*stb3*). CI and CII complexed are  
13 indicated by white stars and circles, respectively.

14 **D.** *stb5a* (Cy5-labeled) was incubated with 0 (lane 1), 500 nM (lane 2), 1  $\mu$ M (lane 3), 2  
15  $\mu$ M (lane 4), 4  $\mu$ M (lane 5), 8  $\mu$ M (lane 6), and 16  $\mu$ M (lane 7) StbA<sub>1-75</sub>.

16

17 **Figure S6. Transcriptional repression activity of StbA and StbA<sub>1-75</sub> on several *stbDR*-carrying**  
18 **promoters of plasmid R388.**

19 The figure shows the percentages of activity of four different promoters carrying *stbDR*  
20 sequences in the presence of StbA or StbA<sub>1-75</sub>. StbA or StbA<sub>1-75</sub> were produced from a co-  
21 residing plasmid pBAD33 (pBAD33::*stbA* or pBAD33::*stbA<sub>1-75</sub>*, respectively) and various  
22 concentrations of inducer (arabinose) were tested as indicated above the graphs.

23 Percentages of promoter activity are calculated as the ratio between the expression  
24 levels (GFP/OD) measured in the presence of pBAD33::*stbA* or pBAD33::*stbA<sub>1-75</sub>* and those

1 measured with the empty vector pBAD33 multiply by 100. Bar charts are described in the  
2 legend on the top of the figure. The upper diagrams show the localization and number of  
3 *stbDR* in each promoter (gray arrows, consensus in red).

4

5

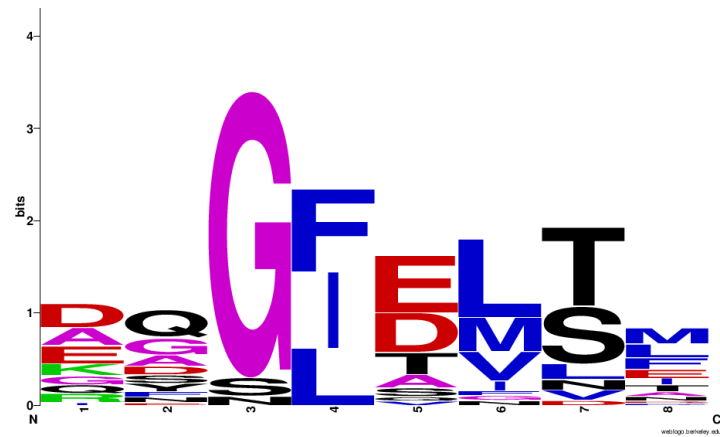

Figure S1

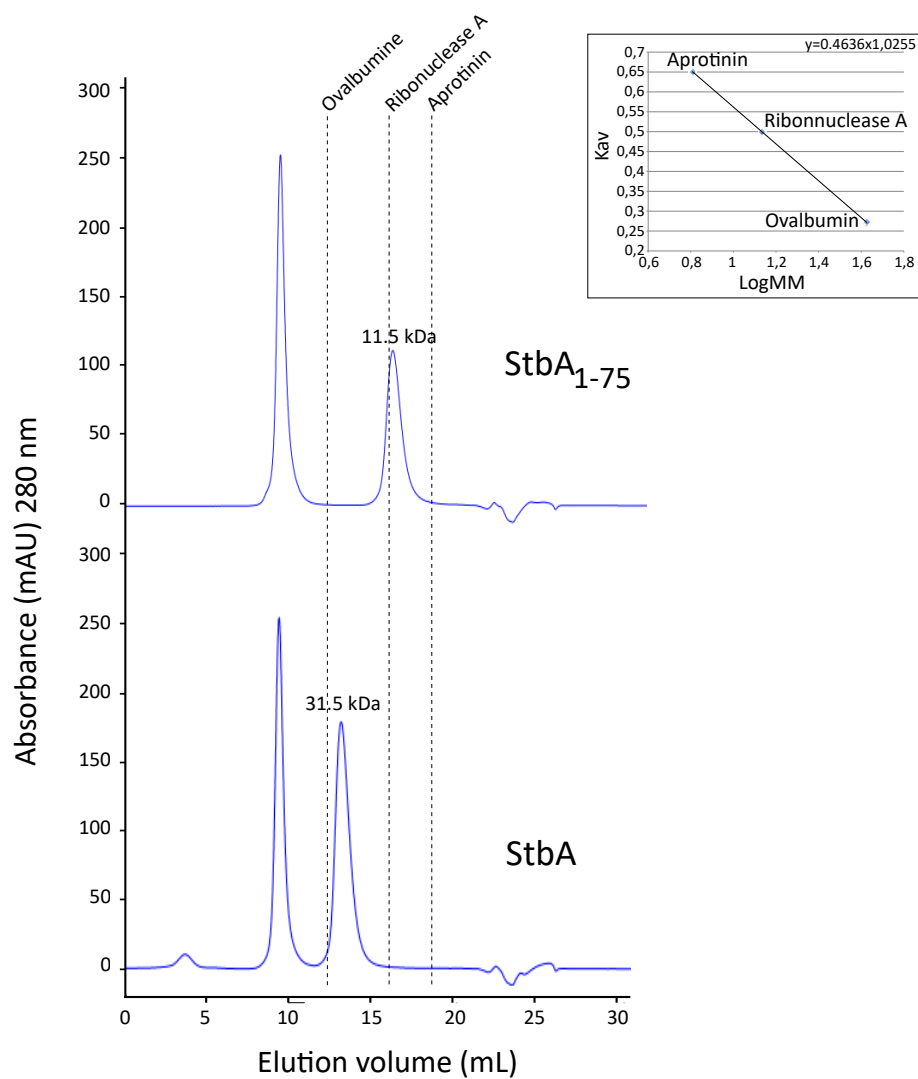

Figure S2

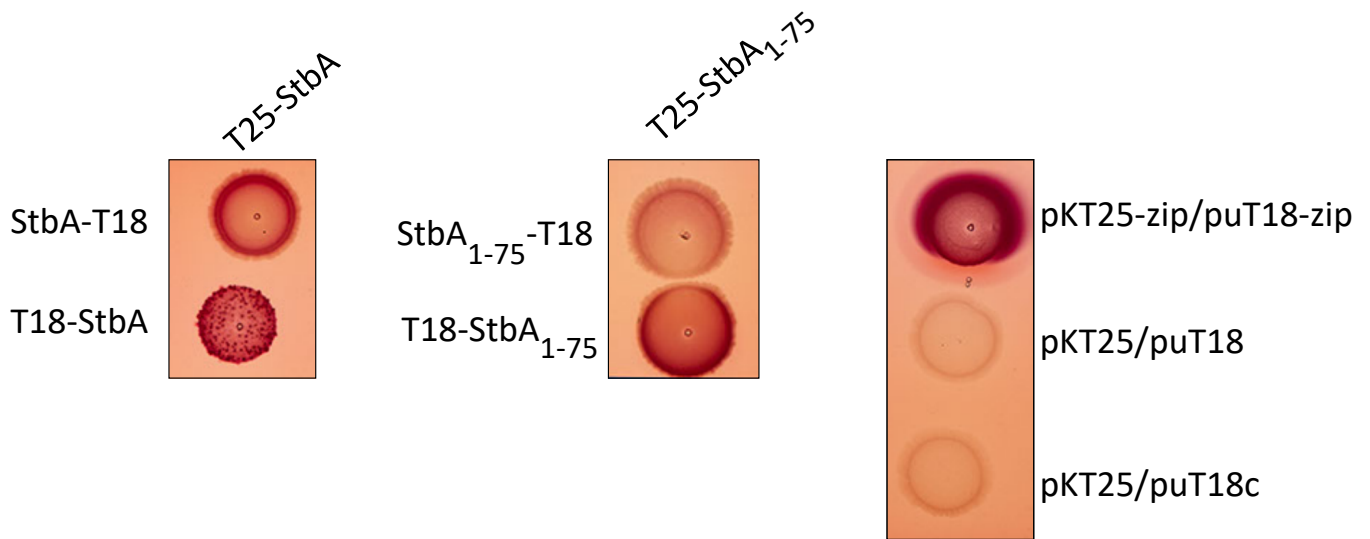

Figure S3



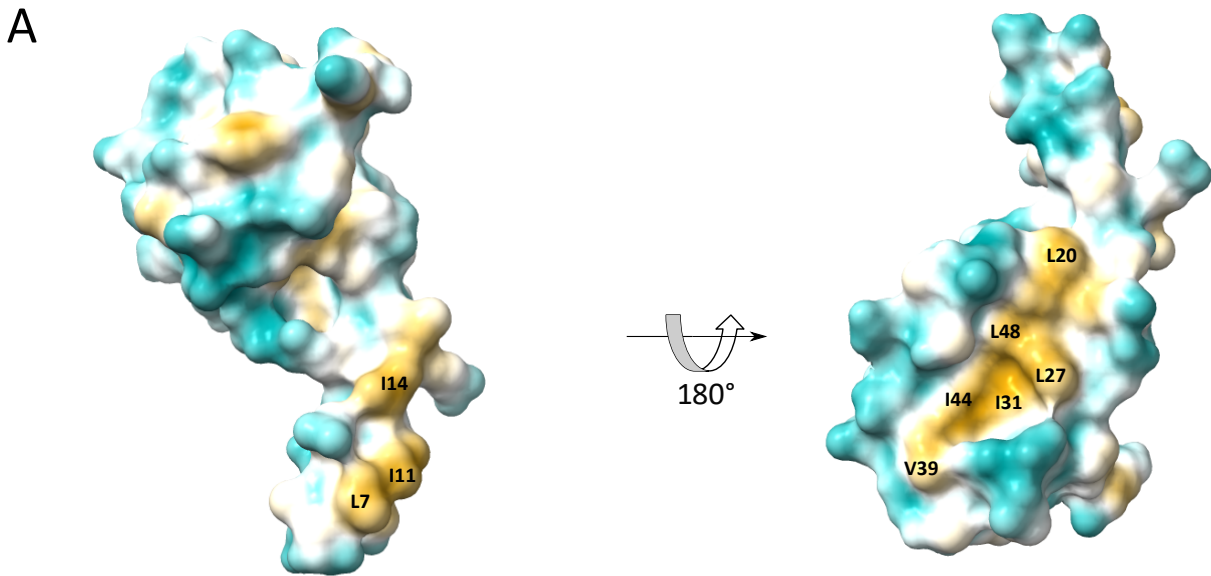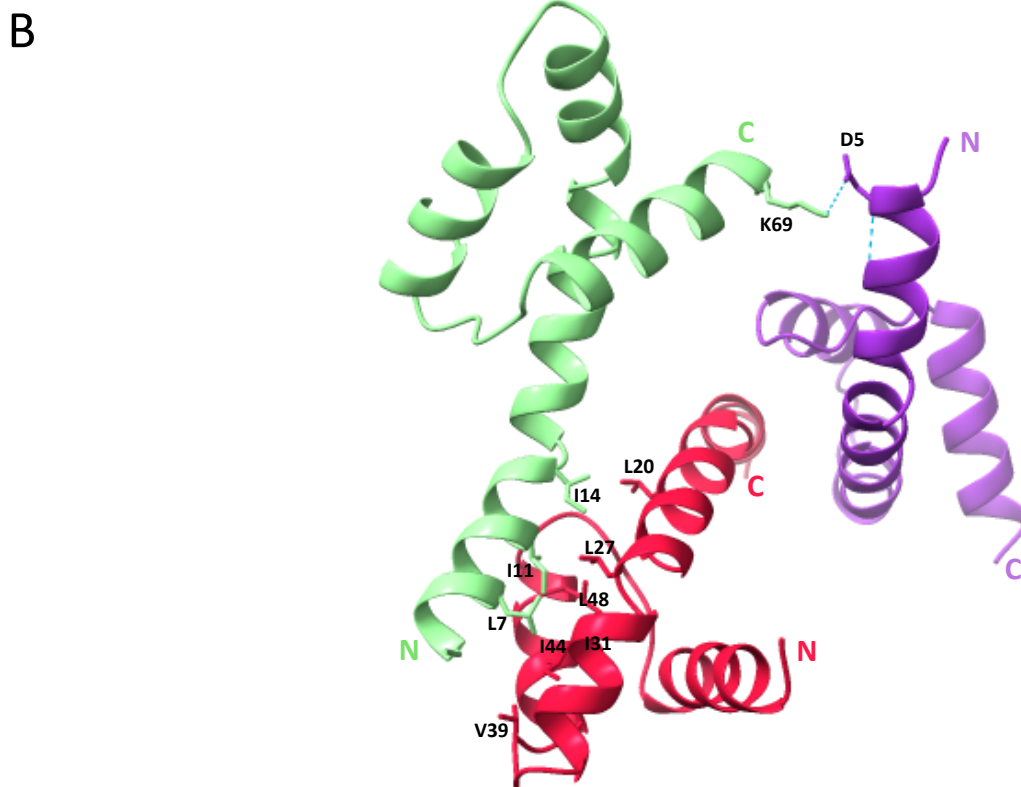

Figure S4

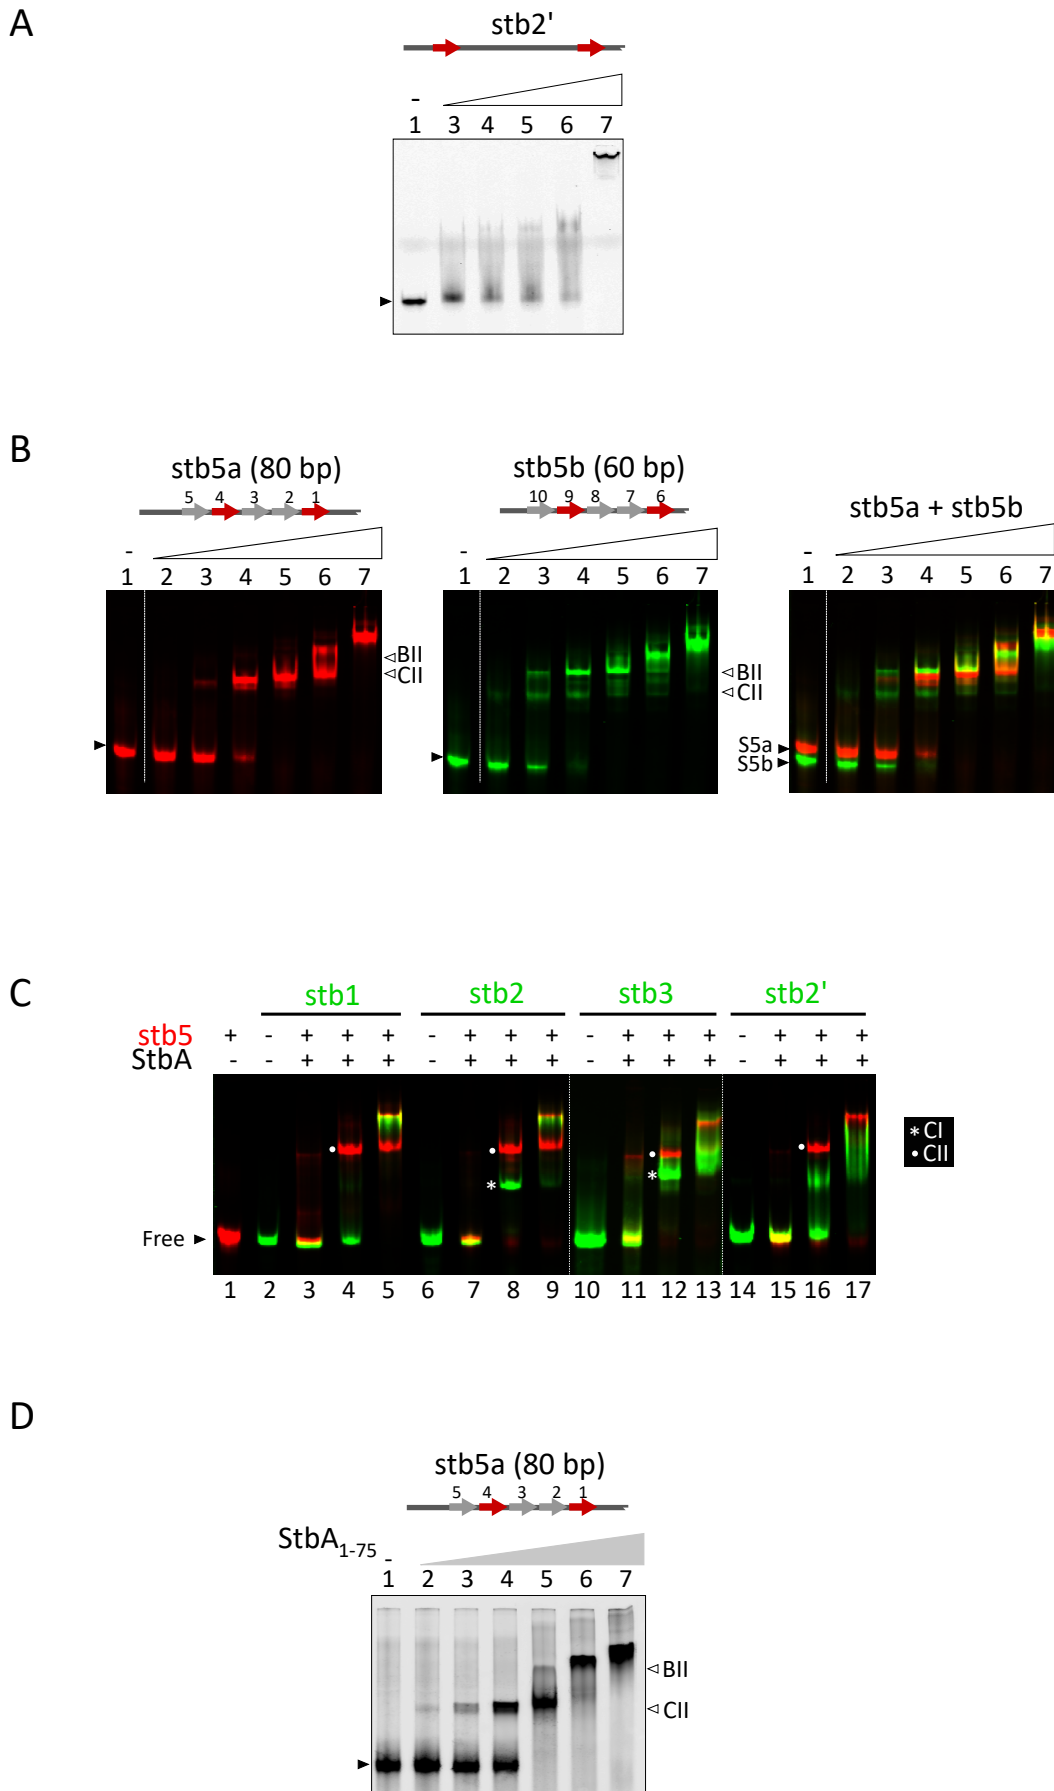

Figure S5

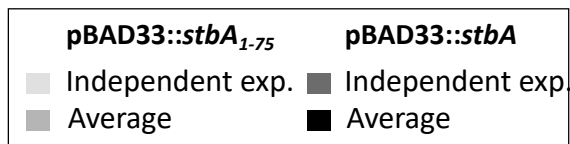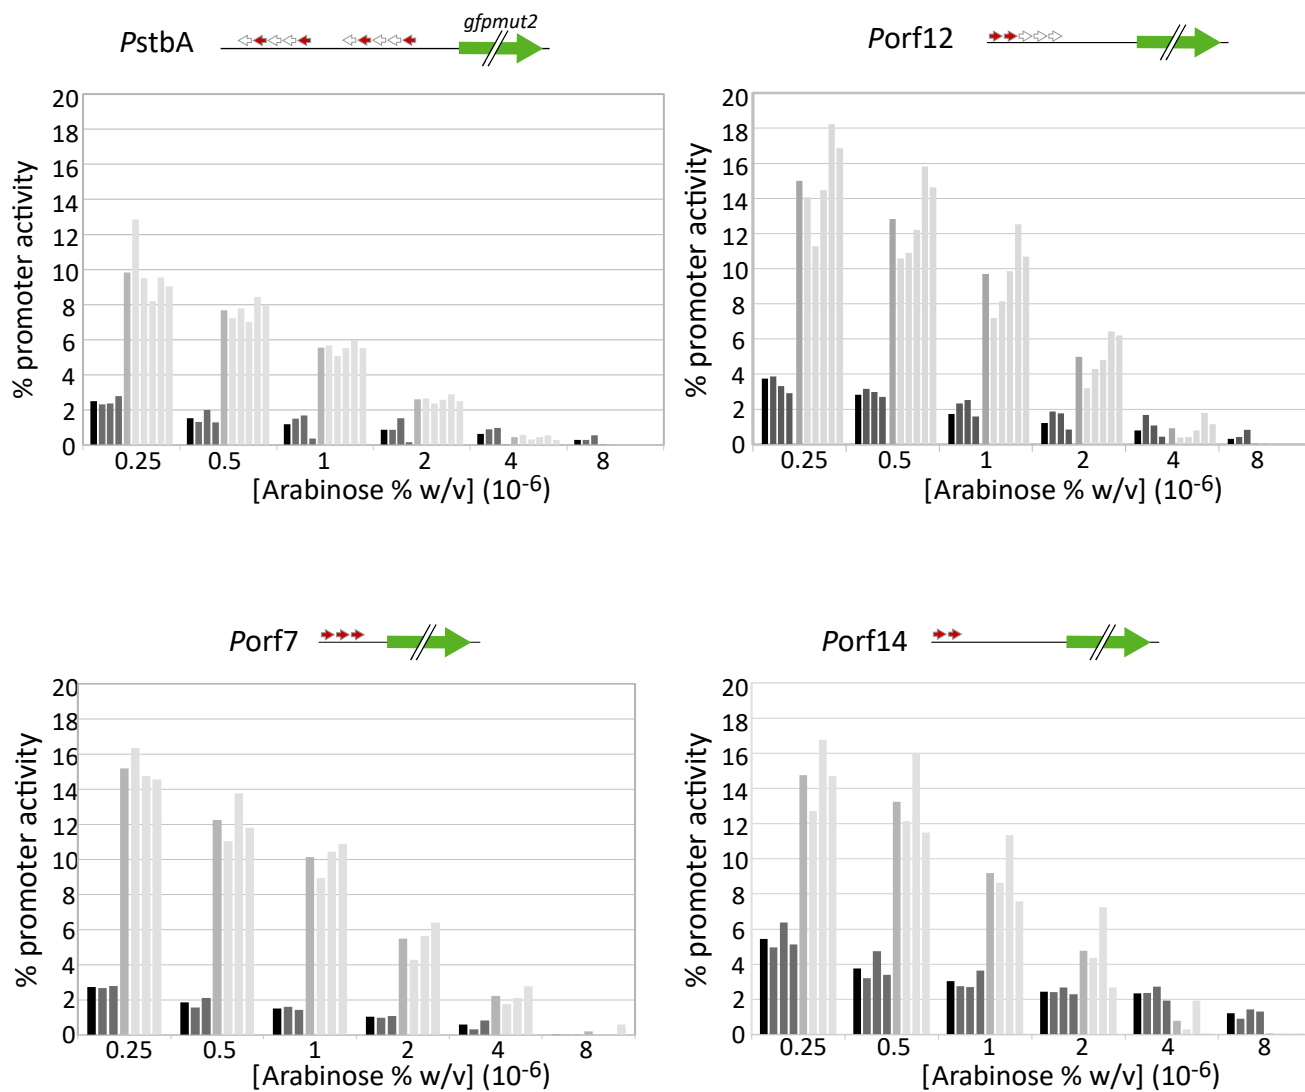

Figure S6

| Strains                                        | Genotype/relevant properties                                                                                                                                  | AB- res      | Source/reference             |
|------------------------------------------------|---------------------------------------------------------------------------------------------------------------------------------------------------------------|--------------|------------------------------|
| DH5α                                           | F <sup>-</sup> <i>endA1 recA1 gyrA96 thi-1 hsdR17 supE44 relA1 Δ(argF- lacZYA) U169 Φ80d lacZ DM15 gyrA96</i>                                                 | Nx           | Sambrook et al., 1989        |
| LN2666                                         | F <sup>-</sup> W1485 <i>thiA thyA leu deoB rpsL</i>                                                                                                           | Sm           | Cornet et al., 1994          |
| LN2666 HU-mcherry                              | LN2666 containing a <i>hupA::mcherry</i> translational fusion that expresses the nucleoid associated protein HU fused with mCherry to label chromosomal DNA.  | Sm           | This study                   |
| BW27783                                        | BW25113 DE( <i>araFGH</i> ) F( <i>ΔaraEp P<sub>CP8</sub>-araE</i> )                                                                                           | Rif          | Khlebnikov et al., 2001      |
| DY380                                          | DH10B derivative containing a defective λ prophage; <i>red</i> , <i>bet</i> and <i>gam</i> genes are controlled by the temperature-sensitive λcI857 repressor | Sm           | Lee et al., 2001             |
| C41 (DE3)                                      | F <sup>-</sup> <i>ompT dcm hsdS (r<sub>B</sub>- m<sub>B</sub>-) galλ (DE3)</i>                                                                                |              | Miroux and Walker, 1996      |
| <b>Plasmids</b>                                |                                                                                                                                                               |              |                              |
| R388                                           | R388 <i>parS-Cm</i>                                                                                                                                           | Tmp,Cm       | Guynet et al., 2011          |
| R388Δ <i>stbA</i>                              | R388 <i>parS-Cm Δ(stbA)</i>                                                                                                                                   | Tmp,Cm       | Guynet et al., 2011          |
| R388Δ <i>stbB</i>                              | R388 <i>parS-Cm Δ(stbB)</i>                                                                                                                                   | Tmp,Cm       | Guynet et al., 2011          |
| R388Δ <i>stbABC</i>                            | R388 <i>parS-Cm Δ(stbABC)</i>                                                                                                                                 | Tmp,Cm       | Guynet et al., 2011          |
| R388 <i>stbA</i> <sub>1-75</sub>               | R388 <i>parS-Cm</i> carrying a truncated <i>stbA</i> gene ( <i>stbA</i> <sub>1-75</sub> ) that encodes StbA <sub>1-75</sub>                                   | Tmp Cm<br>Km | This study                   |
| R388 <i>stbA</i> <sub>1-75</sub> Δ <i>stbB</i> | R388Δ <i>stbB</i> carrying a truncated <i>stbA</i> gene ( <i>stbA</i> <sub>1-75</sub> ) that encodes StbA <sub>1-75</sub>                                     | Tmp Cm<br>Km | This study                   |
| pAPT110                                        | Used for p4G39 and p4G41 constructions (Rep p15A)                                                                                                             | Km,<br>Sp/Sm | Polard and Chandler, 1995    |
| p4G39                                          | pAPT110 carrying the <i>stb</i> operon with the truncated <i>stbA</i> <sub>1-75</sub>                                                                         | Km,<br>Sp/Sm | This study                   |
| p4G41                                          | pAPT110 carrying the <i>stb</i> operon with the truncated <i>stbA</i> <sub>1-75</sub> and deleted of <i>stbB</i>                                              | Km,<br>Sp/Sm | This study                   |
| pET-StbA                                       | pET29C (Novagen) derivative producing StbA                                                                                                                    | Km           | This study                   |
| pET-StbA <sub>1-75</sub>                       | pET29C (Novagen) derivative producing StbA                                                                                                                    | Km           | This study                   |
| pBAD33                                         | Used for pBAD-StbA and pBAD-StbA <sub>1-75</sub> constructions (Rep p15a)                                                                                     | Cm           | Guzman et al., 1995          |
| pBAD-StbA                                      | pBAD33 derivative carrying <i>stbA</i> between <i>XbaI</i> and <i>HindIII</i> sites                                                                           | Cm           | Fernandez-Lopez et al., 2014 |
| pBAD-StbA <sub>1-75</sub>                      | pBAD33 derivative carrying <i>stbA</i> <sub>1-75</sub> between <i>XbaI</i> and <i>HindIII</i> sites                                                           | Cm           | This study                   |
| pALA2705                                       | <i>GFP-ΔN30parB</i> expressing from <i>Plac</i> promoter                                                                                                      | Ap           | Li and Austin, 2002          |

**Table S1. Bacterial strains and plasmids**

| Name                  | Sequence 5' → 3'                                                                                                                                 |
|-----------------------|--------------------------------------------------------------------------------------------------------------------------------------------------|
| G387b                 | TATACACTCCGCTAGCCGCATTGGGTTATCGTGCAAG                                                                                                            |
| G392                  | AGACCTCAGCGCTAGCTCAAGCGCCGAAGAAGTAACC                                                                                                            |
| G426                  | CAGCGTGACCCTAAAGAGGGTCAAACCTGCTCCAATGCGCTATGCGCATTGGGTTATCGTG<br>CAGCAATG                                                                        |
| G427                  | AGGGGCGGCCCGCAGGGCCGCCAGTTCAAGCGCCGAAGAAGTACTCGAGCAGTGTTACA<br>ACCAATTAACC                                                                       |
| G440                  | CACAGCTACTTTCAATTTCTCACTCGCTCGCGCTTTCTTG                                                                                                         |
| G441                  | GCGCGAGCGAGTGAGAAATGAAAGTAGCTGTGATCAATTTTC                                                                                                       |
| G442                  | CAGCCATAAGCTATCCCCGTTACTCACTCGCTCGCGCTTTCTTG                                                                                                     |
| G443                  | CAAGAAAGCGCGAGCGAGTGAGTAACGGGGGATAGCTTATGGCTG                                                                                                    |
| StbA1-75sen           | TATCATATGATGAATGAAACGGACGCC                                                                                                                      |
| StbA1-75asen          | ATTGGATCCTCACTCACTCGCTCGCGCTT                                                                                                                    |
| StbAN                 | AAAAACATATGGTGAATGAAACG                                                                                                                          |
| StbA75                | AAAAACTCGAGTCACTCACTCGCTCG                                                                                                                       |
| stb0 top (5'Cy5)      | CCTTAAACGGCCTATTGTTTCCAAGCGGAGTGACAACAAATGAAAGTAGCTGTGCTTAAGTA<br>TTCAACAAAGCCGCGTC                                                              |
| stb0 bottom           | GACGGCGGCTTTGTTGAATACTTAAGCACAGCTACTTTCAATTTGTTGCTACTCCGCTTGAA<br>CAATAGGCCGTTAAGG                                                               |
| stb1 top (5'Cy3)      | CCGTTCTAGCTCATTCTGTTCTTGCTT <b>GCTGCATCAT</b> CATAGTTGCAACCAATGCCGATCTAG<br>CTCATTACTGTTCTAT                                                     |
| stb1 bottom           | ATAGAACAGTAATGAGCTAGATCGGCATTGGGTTGCAACTATGATGATGCAGCAAGCAAGA<br>ACAGAATGAGCTAGAACGG                                                             |
| stb 2 top<br>(5'Cy3)  | CCGTTCTAGCTCATTCTGTTCTTGCTT <b>GCTGCATCAT</b> ACT <b>GCTGCATCAT</b> CCCAATGCCGATCTAG<br>CTCATTACTGTTCTAT                                         |
| stb2 bottom           | ATAGAACAGTAATGAGCTAGATCGGCATTGGGATGATGCAGTGATGATGCAGCAAGCAAGA<br>ACAGAATGAGCTAGAACGG                                                             |
| stb2' top<br>(5'Cy3)  | CTTGCTT <b>GCTGCATCAT</b> TTCCCTCTTGCAAGCCCCGTTTCCGTCCGTTTTAGCTCATT <b>TTCTGC</b><br><b>ATCAT</b> CCCAATGCCGA                                    |
| stb2' bottom          | TCGGCATTGGGATGATGCAGAAATGAGCTAAAACGGACGGAAACCGGGCTTGCAAGAGG<br>GAAATGATGCAGCAAGCAAG                                                              |
| stb3 top (5'Cy3)      | TAGCTCATTCTGTTCTTGCTT <b>GCTGCATCAT</b> ACT <b>GCTGCATCAT</b> AGCT <b>GCTGCATCAT</b> CAATGCCGAT<br>CTAGCTCATTACTGTTCT                            |
| stb3 bottom           | GAACAGTAATGAGCTAGATCGGCATTGATGATGCAGCTATGATGCAGTGATGATGCAGCAA<br>GCAAGAACAGAATGAGCTA                                                             |
| stb5 top (5'Cy5)      | TCTGTTCTTGCTT <b>GCTGCATCAT</b> ACT <b>GCTGCATCAT</b> ACT <b>GCTGCATCAT</b> ACT <b>GCTGCATCAT</b> ACT <b>GCTGCAT</b><br><b>CAT</b> ATGCCGATCTAGC |
| stb5 bottom           | GCTAGATCGGCATATGATGCAGTGATGATGCAGTGATGATGCAGTGATGATGCAGTGATGATGCAGTGATGA<br>TGCAGCAAGCAAGAACAGA                                                  |
| stb5a top<br>(5'Cy5)  | CCGTTTTAGCTCATT <b>TTCTGCATCAT</b> TGTAGCACCATCATAGCATTATAGTT <b>GCTGCATCAT</b> TGCT<br><b>GCACGATA</b> AACCAATGC                                |
| stb5a bottom          | GCATTGGGTTATCGTGAGCAATGATGCAACTATAATGCTATGATGGTGCTACAATGATGCA<br>GAAAATGAGCTAAAACGG                                                              |
| stb5b top (5'<br>Cy3) | TTGC <b>TGCATCAT</b> AGCT <b>GTCTAT</b> GACT <b>GCTGCATCAT</b> ATT <b>GCTGCATCAT</b> ACAT <b>GCTGCATCAT</b> TTTC                                 |
| stb5b bottom          | GAAATAATGCATGATGATGCAATGTGATGCAGTCATAGGACAGCTATGATGCAGGCAA                                                                                       |

**Table S2. Oligonucleotides used in this study**

| Plasmid            | Genome ID    | Gene name         | Protein ID     |
|--------------------|--------------|-------------------|----------------|
| R388               | NC_028464    | orf18             | YP_009182122   |
| pXCC_55            | LJGA01000018 | traD              | PIB18442.1     |
| pXcmN              | CP013007     | traD              | ASN11688.1     |
| byi_3p             | CP003092     | BYI23_F000840     | AET95635.1     |
| pPO70-2            | CP011519     | traD              | AKK24981.1     |
| pPO70_1            | CP011518     | TraD              | AKK24689.1     |
| pG                 | CP021022     | TraD              | ATS91227.1     |
| pRSC35             | FP885893     | CMR15_p0012       | CBJ36124.1     |
| pPF72-1            | CP011808     | AB870_23485       | AKM33199.3     |
| Collimonas_plasmid | CP009963     | LT85_p053         | AIY44232.1     |
| pPHE101            | MH061178     |                   | AWH58648.1     |
| pNAH7              | AB237655     | traD              | BAE92146.1     |
| pDTG1              | NC_004999    | traD              | NP_863122.1    |
| pWWO               | NC_003350    | traD              | NP_542912.1    |
| unnamed2           | CP021134     | traD              | ARQ77121.1     |
| pPsa22180b         | CP017011     | PsaNZ47_29760     | APQ06932.1     |
| plasmII            | FP340278     | stbA              | CAZ15869.1     |
| plc                | FO681497     | XFF4834R_plc00150 | CDF63747.1     |
| pSG1               | NC_007182    | stbA              | YP_256997.1    |
| R46                | AY046276     | stbA              | AAL13400.1     |
| pEC_L46            | NC_014385    | stbA              | YP_003829311.1 |
| pHYEC7-110         | KX518744     |                   | APO16550.1     |
| pPD885-27          | LT853884     | PD885_04111       | SMR01292.1     |
| plb                | FO681496     | traD              | CDF63733.1     |
| pXap41             | NC_016053    | XAP_pXAP41004     | YP_004888078.1 |
| pXF6c              | AXBS02000019 | B375_0211740      | OJZ69125.1     |
| pMBUI6             | KC170282     | orf21             | AGH89245.1     |
| small              | CP000060     | PSPPH_B0048       | AAZ38103.1     |
| pPsv48C            | NC_019292    | traD              | YP_006962034.1 |
| p14057-KPC         | KY296095     |                   | ASD54089.1     |
| pMBUI4             | KC170278     | stbA              | AGH89049.1     |
| pGP59-34           | CP021974     | CDW43_15865       | AUZ86127.1     |
| unnamed3           | CP014310     | AXG89_30440       | AME28169.1     |

**Table S3: sequence ID of proteins used in Figure 2**
